# 1 **Defective RNA Polymerase III is negatively regulated by the SUMO-Ubiquitin-Cdc48** 2 **Pathway**

3  
4 **Authors:** Zheng Wang<sup>1,\*</sup>, Catherine Wu<sup>1</sup>, Aaron Aslanian<sup>1,2</sup>, John R. Yates III<sup>2</sup>, Tony Hunter<sup>1\*</sup>

## 5 6 **Affiliations:**

7 <sup>1</sup>Molecular and Cellular Biology Laboratory, The Salk Institute for Biological Studies, La Jolla,  
8 CA 92037, USA.

9 <sup>2</sup>The Scripps Research Institute, La Jolla, CA 92037, USA

10 \*Correspondence: [zhwang@salk.edu](mailto:zhwang@salk.edu) (Z.W.), [hunter@salk.edu](mailto:hunter@salk.edu) (T.H.)

## 11 12 **ABSTRACT**

13 Transcription by RNA polymerase III (Pol III) is an essential cellular process, and mutations in  
14 Pol III can cause neurodegenerative disease in humans. However, in contrast to Pol II  
15 transcription, which has been extensively studied, the knowledge of how Pol III is regulated is  
16 very limited. We report here that in budding yeast, *Saccharomyces cerevisiae*, Pol III is  
17 negatively regulated by the Small Ubiquitin-like MOdifier (SUMO), an essential post-  
18 translational modification pathway. Besides sumoylation, Pol III is also targeted by  
19 ubiquitylation and the Cdc48/p97 segregase, the three of which likely act in a sequential manner  
20 and eventually lead to proteasomal degradation of Pol III subunits, thereby repressing Pol III  
21 transcription. This study not only uncovered a regulatory mechanism for Pol III, but also  
22 suggests that the SUMO and ubiquitin modification pathways and the Cdc48/p97 segregase can  
23 be potential therapeutic targets for Pol III-related human diseases.

## 24 25 **INTRODUCTION**

26 Eukaryotes have three conserved DNA-directed RNA polymerases (RNA Pols) (Roeder &  
27 Rutter, 1969, 1970; Weinmann & Roeder, 1974; Zylber & Penman, 1971), where Pol I  
28 transcribes most of the rRNAs, Pol II transcribes mRNA, and Pol III transcribes tRNA, 5S  
29 rRNA, as well as some non-coding RNAs, such as the U6 snRNA involved in mRNA splicing.  
30 The Pol III machinery includes the polymerase itself (composed of 17 subunits), as well as basal  
31 transcription factors TFIIIA, the TFIIIB complex, and the TFIIIC complex (Geiduschek &

32 Kassavetis, 2001). In budding yeast, *Saccharomyces cerevisiae*, TFIIB is composed of Brf1,  
33 Bdp1, and TBP. TFIIC is composed of Tfc1, Tfc3, Tfc4, Tfc6, Tfc7, and Tfc8. For 5S rRNA  
34 transcription, all three basal transcription factors are required, whereas tRNA transcription only  
35 requires TFIIB and TFIIC. As important as it is for normal cell physiology, Pol III plays critical  
36 roles in pathological processes, such as virus infection (Chiu, Macmillan, & Chen, 2009) and  
37 tumorigenesis (White, 2004). In addition, Pol III mutations were recently found to cause  
38 neurodegenerative diseases in humans. Mutations that cause hypomyelinating leukodystrophy  
39 with 4H syndrome occur predominantly in the largest two subunits of Pol III, POLR3A and  
40 POLR3B (Rpc160 and Rpc128 in yeast, respectively) (Bernard et al., 2011; Saitsu et al., 2011;  
41 Shimojima et al., 2014; Synofzik, Bernard, Lindig, & Gburek-Augustat, 2013; Terao et al., 2012;  
42 Tetreault et al., 2011), with a few in POLR1C (Rpc40 in yeast) (Thiffault et al., 2015), a subunit  
43 shared by Pol I and Pol III. Four mutations in BRF1 were found to cause a cerebellar-facial-  
44 dental syndrome (Borck et al., 2015).

45  
46 How Pol III transcription is regulated is still poorly understood. Current knowledge of Pol III  
47 regulation is largely limited to phosphorylation of the Pol III machinery components, such as  
48 Maf1 (Moir et al., 2006; Oficjalska-Pham et al., 2006; Roberts, Wilson, Huff, Stewart, & Cairns,  
49 2006) and the Rpc53 subunit of Pol III (Lee, Moir, McIntosh, & Willis, 2012). Maf1 is a robust  
50 Pol III repressor (Boguta, 2013; Moir & Willis, 2013). Upon stress, Maf1 is dephosphorylated  
51 and translocated into the nucleus, where it binds Pol III and blocks its interaction with TFIIB  
52 (Desai et al., 2005; Moir et al., 2006; Roberts et al., 2006; Vannini et al., 2010). Phosphorylation  
53 of Rpc53 by the Mck1 and Kns1 kinases also represses Pol III under stress conditions, although  
54 the mechanism is unclear (Lee et al., 2012). SUMO is another potential regulator for Pol III that  
55 could act as a transcriptional repressor (Neyret-Kahn et al., 2013; Rohira, Chen, Allen, &  
56 Johnson, 2013), or activator (Chymkowitch et al., 2017), but how sumoylation regulates Pol III  
57 is largely unclear. Therefore, deeper insights regarding the regulatory mechanisms of Pol III  
58 transcription are needed to design therapeutic tools that can be used to modulate Pol III activity  
59 accordingly in human diseases.

60  
61 Post-translational modification by SUMO is a conserved pathway and is essential for viability in  
62 most organisms (Kerscher, Felberbaum, & Hochstrasser, 2006). Similar to ubiquitin

63 modification, SUMO is conjugated to a lysine residue within the target protein through a cascade  
64 of reactions catalyzed by a SUMO-specific E1 activating enzyme (Johnson, Schwienhorst,  
65 Dohmen, & Blobel, 1997), an E2 conjugating enzyme (Johnson & Blobel, 1997), and E3 ligases  
66 (Johnson & Gupta, 2001; Strunnikov, Aravind, & Koonin, 2001; Takahashi, Kahyo, Toh,  
67 Yasuda, & Kikuchi, 2001; Zhao, Wu, & Blobel, 2004). SUMO proteases are responsible for both  
68 the maturation of the SUMO polypeptide (Li & Hochstrasser, 1999) and the removal of SUMO  
69 from modified proteins (Li & Hochstrasser, 2000). Sumoylation can trigger ubiquitylation  
70 through the activity of SUMO-Targeted Ubiquitin E3 Ligases (STUbLs) (Mullen & Brill, 2008;  
71 Prudden et al., 2007; Sun, Levenson, & Hunter, 2007; Xie et al., 2007). Besides ubiquitylation,  
72 SUMO can also recruit the Cdc48 (p97)-Ufd1-Npl4 segregase complex, through the SUMO-  
73 interacting motifs (SIMs) in Cdc48 and Ufd1 (Bergink et al., 2013; Nie et al., 2012). The key to  
74 fully understand the functions of sumoylation is its substrates. Ever since its discovery two  
75 decades ago (Mahajan, Delphin, Guan, Gerace, & Melchior, 1997; Matunis, Coutavas, & Blobel,  
76 1996; Okura et al., 1996), biochemical approaches have been greatly improved to identify  
77 thousands of sumoylated proteins, as well as their conjugation sites (Hendriks et al., 2014;  
78 Lamoliatte et al., 2014; Tammsalu et al., 2014), underscoring the importance of this modification  
79 in the cell. However, how sumoylation affects the functions of its protein substrates is still a  
80 challenging question that remains largely unanswered, because mutating the conjugation sites  
81 usually does not cause any obvious phenotype. To address this issue, a phenotype-based genetic  
82 method is needed.

83

## 84 **RESULTS**

### 85 **A reverse suppressor screen identified Pol III as a major functional target of SUMO.**

86 We designed a reverse suppressor screen in budding yeast, *Saccharomyces cerevisiae*, with the  
87 goal of identifying proteins or pathways, for which loss of sumoylation results in a phenotype.  
88 Specifically, the screen looks for lethal or sick mutations that can be rescued by a dominant  
89 Q56K mutation in SUMO (*SMT3-Q56K*). *SMT3-Q56K* is one of the SUMO pathway mutations  
90 identified previously in the *mot1-301* suppressor screen (Z. Wang, Jones, & Prelich, 2006)  
91 (**Table S1**), and it suppresses *mot1-301* dominantly (**Figure S1**). *SMT3-Q56K* cells are viable,  
92 suggesting the mutated protein is partially functional (data not shown). To perform the screen  
93 (**Figure S2, Materials and Methods**), yeast cells were first transformed with a plasmid carrying

94 *URA3* and *SMT3-Q56K*, followed by random mutagenesis, and allowed to grow into single  
 95 colonies. Using the *ade2/ade3* color assay, yeast cells will turn red in the presence of the  
 96 plasmid. If a clone carries a lethal/sick mutation that can be rescued by *SMT3-Q56K*, the cells  
 97 can no longer lose the plasmid in order to grow. All cells from this clone will thus maintain the  
 98 plasmid, forming a colony that is uniformly red. Such colonies will be sensitive to 5-fluoroorotic  
 99 acid (5FOA), which counter-selects the *URA3* gene on the plasmid. Mutated genes can  
 100 subsequently be cloned by transforming with a genomic DNA library and screening for 5FOA-  
 101 resistant colonies. Mutations are then identified by PCR sequencing of the gene locus.

102  
 103 The screen results are  
 104 summarized in **Table 1**. First,  
 105 the screen identified mutations  
 106 in expected genes, including  
 107 *MOT1* and *SMT3*. The screen  
 108 also revealed mutations in *AOS1*  
 109 (SUMO E1) and *ULP2* (SUMO  
 110 protease), which was not  
 111 surprising, as they encode  
 112 enzymes in the SUMO pathway.  
 113 Strikingly, the remaining 13  
 114 mutations were all in genes  
 115 encoding components of the Pol  
 116 III transcription machinery,  
 117 including the largest two  
 118 subunits of Pol III (Rpc160 and  
 119 Rpc128), a TFIIB subunit

**Table 1. Summary of mutations rescued by *SMT3-Q56K*.**

| Gene          | Protein                   | # of alleles | Mutations                                                                                                                                                                                                                           |
|---------------|---------------------------|--------------|-------------------------------------------------------------------------------------------------------------------------------------------------------------------------------------------------------------------------------------|
| <i>MOT1</i>   | Negative regulator of TBP | 3            | <i>mot1-399</i> (Q1587 Stop)<br><i>mot1-517</i> (G1410R)<br><i>mot1-753</i> (G1300S)                                                                                                                                                |
| <i>SMT3</i>   | SUMO                      | 4            | Not sequenced                                                                                                                                                                                                                       |
| <i>AOS1</i>   | SUMO E1                   | 1            | <i>aos1-492</i> (G56S)                                                                                                                                                                                                              |
| <i>ULP2</i>   | SUMO protease             | 4            | <i>ulp2-4</i> (S108 Stop)<br><i>ulp2-253</i> (G265D)<br><i>ulp2-527</i> (W532 Stop)<br><i>ulp2-63</i> (W532 Stop)                                                                                                                   |
| <i>RPC160</i> | RNA Pol III subunit       | 8            | <i>rpc160-58</i> (M809I)<br><i>rpc160-85</i> (G1297D)<br><i>rpc160-33</i> (T379I)<br><i>rpc160-419</i> (A880T)<br><i>rpc160-426</i> (E282K)<br><i>rpc160-480</i> (G1098D)<br><i>rpc160-628</i> (R365K)<br><i>rpc160-211</i> (G606S) |
| <i>RPC128</i> | RNA Pol III subunit       | 2            | <i>rpc128-202</i> (A704T)<br><i>rpc128-578</i> (D501N)                                                                                                                                                                              |
| <i>BRF1</i>   | TFIIB subunit             | 1            | <i>brf1-137</i> (S271L)                                                                                                                                                                                                             |
| <i>TFC1</i>   | TFIIC subunit             | 1            | <i>tfc1-321</i> (N255K, Fs)<br>(AAC-AAAC, Ins, Fs)                                                                                                                                                                                  |
| <i>TFC6</i>   | TFIIC subunit             | 1            | <i>tfc6-192</i> (G391E)                                                                                                                                                                                                             |

120 (Brf1), and two TFIIC subunits (Tfc1 and Tfc6). To confirm the screen results, the identified  
 121 mutations were introduced into wild type cells, and subsequently crossed with a strain lacking a  
 122 major SUMO E3 ligase, Siz1 (*siz1Δ*). For example, introduction of the M809I mutation in  
 123 Rpc160 (**Figure 1A**) and the A704T mutation in Rpc128 (**Figure 1B**) caused severe growth  
 124 defects, while *siz1Δ* fully rescued *rpc160-M809I* and partially rescued *rpc128-A704T*, as

125 expected. However, the deletion of the closely related SUMO E3 ligase, *SIZ2*, did not rescue  
 126 (**Figure 1C**). Correlating with the growth phenotype, the amount of total tRNA (**Figure 1D**) as  
 127 well as individual tRNA species, including mature and pre-mature intron-containing tRNAs  
 128 (**Figure 1E**), were dramatically decreased in *rpc160* mutant cells, but were restored to normal  
 129 levels by *siz1Δ*. Interestingly, *siz1Δ* did not further increase tRNA levels in wild type *RPC160*  
 130 cells. No change in 5S rRNA was observed, which is a common phenomenon. This is likely  
 131 because 5S rRNA is produced in excess, and that Pol III has a higher affinity for the initiation  
 132 complex containing TFIIA, which is required for the transcription of 5S rRNA, but not tRNAs  
 133 (Stettler, Mariotte, Riva, Sentenac, & Thuriaux, 1992).

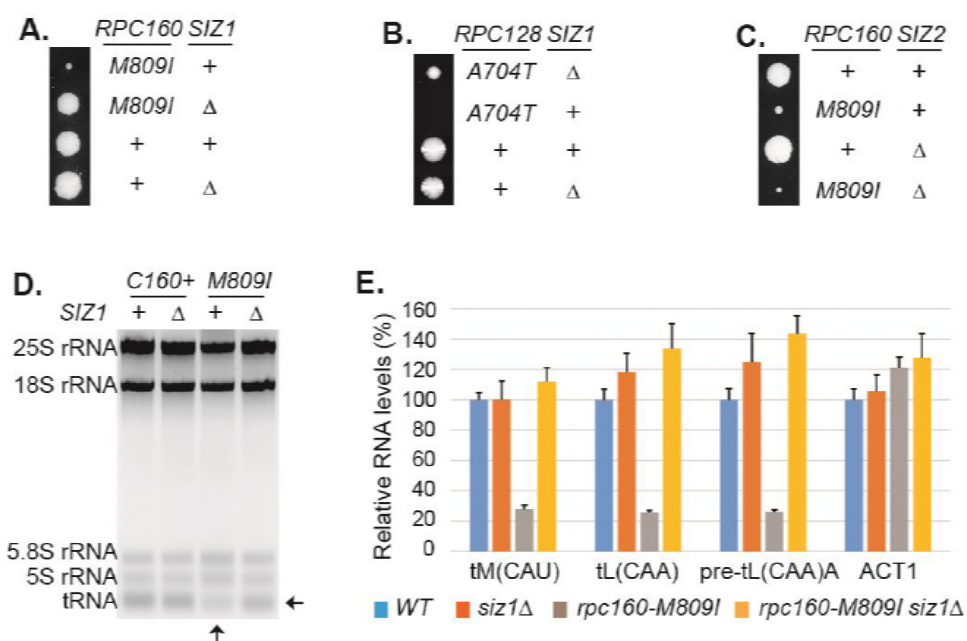

**Figure 1. Disrupting sumoylation rescues Pol III mutations.** (A) Tetrad analysis of a cross between *rpc160-M809I* and *siz1Δ*. Tetrads were dissected on YPD, then incubated at 30°C for four days. The offspring of one representative tetrad was shown with genotypes labeled. (B) Similar tetrad analysis for *rpc128-A704T* and *siz1Δ*. (C) Similar tetrad analysis for *rpc160-M809I* and *siz2Δ*. (D) 2 μg of RNA extracted from the indicated strains was run on a 2.8% agarose gel containing ethidium bromide, then visualized with UV. (E) RNA from (C) was reverse transcribed into cDNA, followed by real-time PCR analysis. GAPDH transcripts were used as loading control. Data are mean ± standard deviation calculated from 6 data points (two biological replicates and three technical replicates), presented as relative amount compared to wild type. The intron-containing pre-mature tRNA (pre-tL(CAA)A) is short-lived, so its abundance reflects the Pol III transcriptional activity.

134  
 135 Based on the Cryo-EM structure of Pol III (Hoffmann et al., 2015), most of the mutations  
 136 identified by the screen occurred on residues close to the bound DNA template or the growing

137 RNA chain (**Table S2**), suggesting that the mutations could impact Pol III enzyme activity and  
138 thus cause severe growth defects. However, none of these mutants have been reported before, so  
139 their actual enzymatic defects are unclear. We therefore tested whether previously described Pol  
140 III mutations, including *rpc31-236* which is an initiation defective mutant (Thuillier, Stettler,  
141 Sentenac, Thuriaux, & Werner, 1995), as well as two elongation mutants, *rpc160-112* (Dieci et  
142 al., 1995) and *rpc160-270* (Thuillier, Brun, Sentenac, & Werner, 1996), could be rescued by  
143 reduced sumoylation, and found that all three mutants were rescued by *siz1Δ* (**Figure S3A**).  
144 Besides these loss-of-function mutations, when expression of wild type *RPC160* was reduced by  
145 growth of a strain in which the only *RPC160* gene was under the *GAL1* promoter in glucose, the  
146 resultant slow growth phenotype was partially rescued by *siz1Δ* (**Figure S3B**). We also tested  
147 whether human Pol III mutations that cause neuronal diseases, which were introduced into yeast  
148 Rpc160, Rpc128, and Brf1 at corresponding positions based on sequence homology, could be  
149 rescued when sumoylation was compromised. Among the seventeen Rpc160 mutations tested for  
150 growth under normal conditions and at elevated temperature (37°C) (**Table S3**), two single  
151 (Q608K and E1329K) and two double mutations (D384N, N789I and Q608K, G1308S) caused  
152 growth defects, which could all be rescued by *siz1Δ*, except for E1329K (**Figure S3C**). For  
153 Rpc128, only one of the five single mutations (L1027P) showed slower growth, which was  
154 rescued by *siz1Δ* (**Figure S3D**). All *rpc128* double mutations were lethal, and not rescued by  
155 *siz1Δ* (**Table S3**). For the four *brf1* single mutations, three showed growth defects, two of which  
156 were rescued by *siz1Δ* (**Figure S3E**). These results confirmed the roles of SUMO in Pol III  
157 transcription, suggesting that SUMO can repress Pol III but the effect is most obvious when Pol  
158 III activity is greatly reduced either through decreased expression or inactivating mutation.

159

### 160 **SUMO preferentially targets Pol III and acts independently of the known Pol III** 161 **repressors.**

162 To gain further insights about the functions of SUMO in Pol III transcription, several specificity  
163 tests were performed. It is surprising that our screen only identified Pol III but not either of the  
164 other two polymerases, given the fact that the three polymerases are very similar to each other,  
165 with many related subunits and even shared subunits. We therefore first tested if it was due to a  
166 specific function of SUMO or simply because the screen was not saturated, by introducing  
167 similar mutations into the three RNA polymerases, such as an aspartic acid mutation to the



168 glycine residue in the highly conserved “trigger loop” domain in the largest subunits of the  
 169 polymerases (Fernandez-Tornero et al., 2013; Hoffmann et al., 2015; D. Wang, Bushnell,  
 170 Westover, Kaplan, & Kornberg, 2006) (**Figure 2A**). Interestingly, while the G to D mutation  
 171 caused severe growth defect in all three cases, only the G1098D mutation in Rpc160 (Pol III)  
 172 was rescued by *siz1Δ*, suggesting SUMO preferentially targets Pol III rather than Pol I or Pol II.  
 173  
 174 We next compared SUMO to known Pol III repressors, including Maf1 and the Mck1 and Kns1  
 175 kinases. Surprisingly, none of these proteins, when depleted by deleting the encoding genes,  
 176 could rescue the *rpc160* mutant growth defect (**Figure 2B, 2C, and 2D**). Furthermore, *siz1Δ*  
 177 could rescue *rpc160* even in the absence of Maf1 (**Figure 2E**), and reverse the ability of *rpc160*  
 178 to rescue *maf1Δ* on glycerol media (**Figure 2F**). Therefore, SUMO specifically targets Pol III for  
 179 repression, and it does so through a mechanism that is independent of Maf1 or the Mck1 and  
 180 Kns1 kinases.

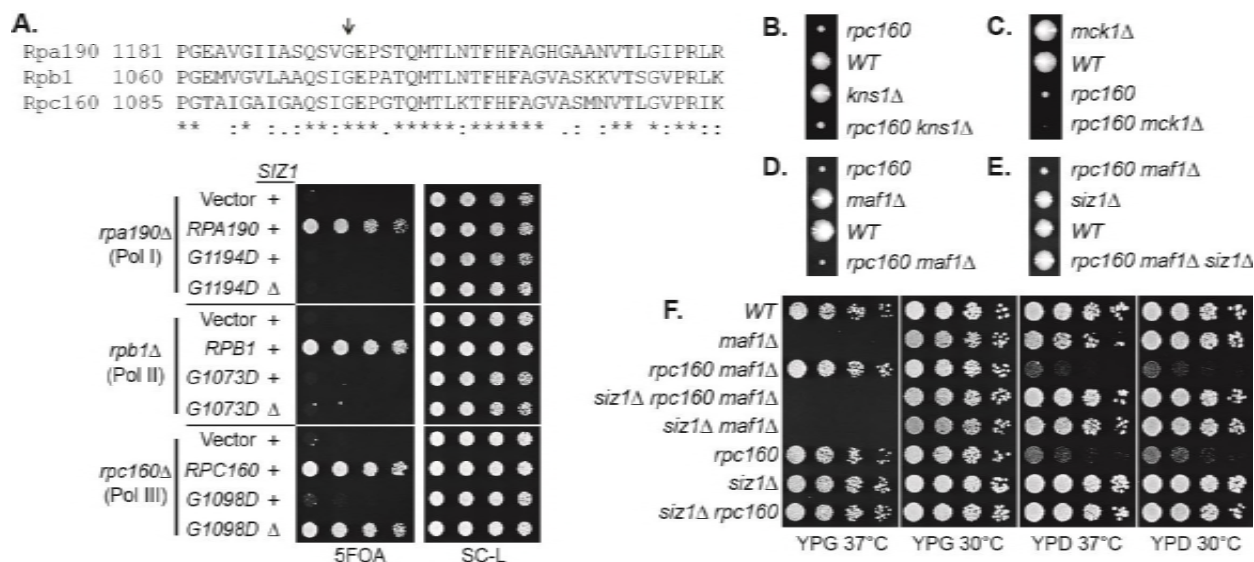

**Figure 2. Specificity of the rescue effect.** (A) The *rpa190Δ*, *rpb1Δ*, or *rpc160Δ* strain carries a *URA3* plasmid carrying wild type *RPA190*, *RPB1*, and *RPC160* gene, respectively, in order to maintain viability. These strains were then transformed with *LEU2* plasmids carrying the indicated wild type or mutant alleles, and selected on synthetic media lacking leucine (SC-L). Transformants were spotted in 5-fold serial dilutions onto a 5FOA plate to assess the growth phenotype of the mutant allele, as the original *URA3* plasmids were shuffled out of the cell in the presence of 5FOA. (B-D) Tetrad analysis between *rpc160-M809I* (shown as *rpc160*) and *kns1Δ*, *mck1Δ*, and *maf1Δ*. (E) Tetrad analysis between *rpc160-M809I siz1Δ* and *maf1Δ*. (F) The indicated strains from the cross in (E) were plated in 5-fold dilutions onto YPD (glucose) or YPG (glycerol) plates and incubated at 30°C or 37°C as indicated.

182 **SUMO represses Pol III by modifying Rpc53.**

183 To understand the underlying molecular mechanism, the key is the relevant sumoylated  
184 protein(s), which is likely in the Pol III machinery itself. To identify this protein(s), we made a  
185 strain expressing Flag-tagged Rpc160-M809I and GFP-SUMO, as well as single-tagged strains  
186 as negative controls. Mutant *rpc160-M809I* was used, because sumoylation has stronger effects  
187 on mutant Pol III than the wild type (**Figure 1D and 1E**). Pol III was first immunoprecipitated  
188 (IP) by anti-Flag beads (**Figure 3A**). Clear sumoylation signals were detected associated with  
189 Pol III. These Pol III-associated sumoylated proteins were released and subsequently purified by  
190 IP with GFP-trap beads, then analyzed by mass-spectrometry (**Figure 3B**). Four Pol III  
191 components (Rpc160, Rpc82, Rpc53, and Rpc37) were identified. Rpc160 (~160 kDa) is likely  
192 to be a contaminant, because the detected sumoylated species ran no slower than the 150 kDa  
193 marker band (**Figure 3A**). Rpc82 sumoylation was reported previously to occur on K406 (Panse,  
194 Hardeland, Werner, Kuster, & Hurt, 2004). However, *rpc82-K406R* did not rescue *rpc160-*  
195 *M809I* (data not shown), suggesting Rpc82 is not the relevant sumoylated protein.

196  
197 Rpc53 and Rpc37 form a subcomplex in the Pol III holoenzyme (Hoffmann et al., 2015;  
198 Kassavetis, Prakash, & Shim, 2010; Landrieux et al., 2006). Identifying both of them suggests  
199 that they are either tightly associated with a sumoylated protein or are sumoylated themselves.  
200 Indeed, Rpc53 was extensively sumoylated in vivo, and this was largely dependent on Siz1 but  
201 not Siz2 (**Figure 3C**), correlating with the fact that *siz2Δ* did not rescue the *rpc160* mutant  
202 growth defect (**Figure 1C**). Rpc53 was sumoylated more extensively in *rpc160* mutant cells  
203 (**Figure 3D**), suggesting that it may serve as a better SUMO substrate when Pol III is defective.  
204 The major sumoylation sites were mapped to K51, K115, and K236, by showing that mutating  
205 all three of them to arginines (*K51*, *115*, *236R*, or *rpc53-3KR*) abolished the majority of  
206 sumoylation, and no modification was detected when the N-terminal 274 amino acids of Rpc53  
207 were deleted ( $\Delta$ 2-275) (**Figure 3E**). Importantly, *rpc53-3KR* rescued the *rpc128-A704T* growth  
208 defect (**Figure 3F**), whereas SUMO fusion to the N-terminus of Rpc53 (*Su-rpc53-3KR*), which  
209 mimics constitutive sumoylation, abolished the rescue effect of Rpc53-3KR. The SUMO-Rpc53-  
210 3KR fusion protein was expressed and functional, as it fully complemented the growth defect of  
211 *rpc53* null (**Figure 3G**). The rescue by *rpc53-3KR* was partial, suggesting additional  
212 modification sites in Rpc53 or other relevant SUMO substrates exist. Nevertheless, these results



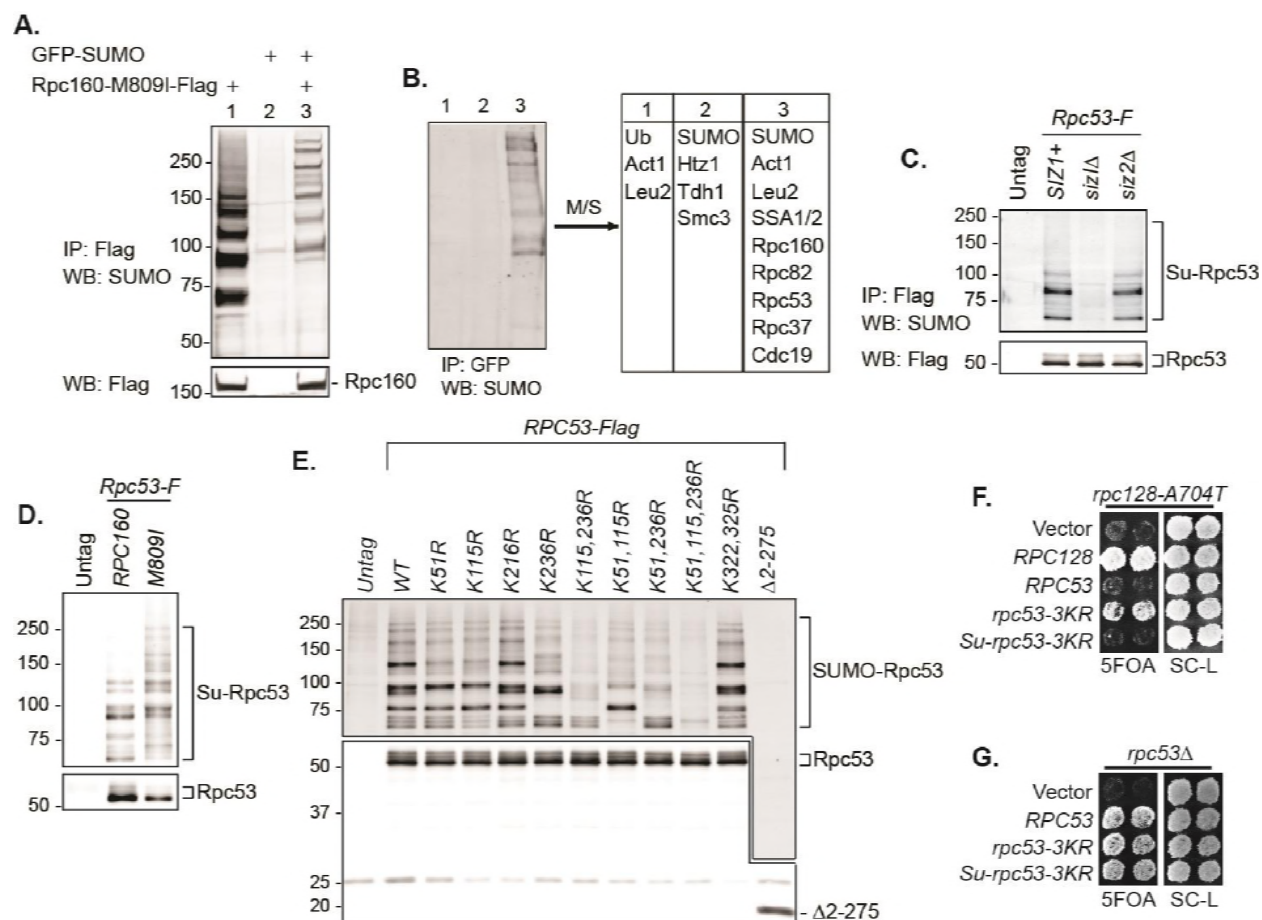

**Figure 3. SUMO represses Pol III by modifying Rpc53.** (A) Total protein extracted from the indicated strains was subjected to anti-Flag IP to purify Flag-tagged Rpc160 Pol III complexes and associated proteins. Precipitated proteins were eluted with Flag peptide, followed by SDS-PAGE and immunoblot analysis with an anti-Flag or anti-SUMO antibody. (B) The eluant from (A) was subjected to anti-GFP IP using GFP-Trap beads to isolate the sumoylated species from Pol III. The beads were subsequently washed with PBS containing 8M urea and 1% SDS to remove Rpc160-associated unmodified proteins, then incubated with 2x Laemmli's buffer at 100°C to elute sumoylated proteins. The success of the IP was confirmed by anti-SUMO immunoblot. The purified materials were subjected to tryptic digestion and analyzed by mass-spectrometry. (C) Flag-tagged Rpc53 was IP-ed from the indicated strains using anti-Flag beads, and detected by an anti-Flag antibody (bottom). Sumoylated Rpc53 (Su-Rpc53) was detected by anti-SUMO antibody (top). An untagged *RPC53* strain was used as a negative control. (D) Similar experiment as in (C) showing Rpc53 sumoylation in wild type *RPC160* cells versus *rpc160-M809I* mutant cells. (E) Mapping Rpc53 sumoylation sites by mutagenesis analysis. *CEN* plasmids carrying wild type or mutant Flag-tagged *RPC53* were co-transformed with a  $2\mu$  *SMT3* plasmid into a wild type yeast strain. Rpc53-Flag proteins were purified with anti-Flag IP, followed by SDS-PAGE and immunoblot analysis with anti-Flag (bottom) or anti-SUMO antibody (top). (F) An *rpc128-A704T* strain carrying a *URA3 RPC128* plasmid was transformed with *LEU2*-based *RPC128* or *RPC53* plasmids, then grown on 5FOA medium, which forces the cells to lose the *URA3 RPC128* plasmid. *rpc53-3KR* (K51,115,236R) rescued the growth of *rpc128-A704T*, whereas N-terminal SUMO fusion (*Su-rpc53-3KR*) abolished the rescue effect. The rescue effect is dominant because all the cells in this experiment contain wild type *RPC53* in the genome. (G) Similar plasmid shuffle experiment as in Figure 2A. The *LEU2* plasmids carrying the indicated *RPC53* alleles were transformed into an *rpc53Δ* strain containing a *URA3 RPC53* plasmid. The transformants were then plated onto a 5FOA plate to lose the *URA3 RPC53* plasmid, and the results showed that the N-terminally SUMO-fused Rpc53 protein (*Su-rpc53-3KR*) fully supports cell viability.

214 confirmed a direct relationship between SUMO and Pol III, and suggest that Rpc53 sumoylation  
 215 can repress a defective Pol III machinery.

216

217 **Pol III is repressed by ubiquitylation and the Cdc48 segregase.**

218 Sumoylation itself is not sufficient to inhibit Pol III and the effect of SUMO seems to be indirect,

219 based on the facts that constitutive sumoylation of Rpc53 did not lead to any growth defect

220 (**Figure 3G**), and that *rpc160-M809I* could also be rescued by a SUMO protease mutant, *ulp2-*

221 *101* (**Figure S4A**), which did not abolish Rpc53 sumoylation (**Figure S4B**). Therefore, it is

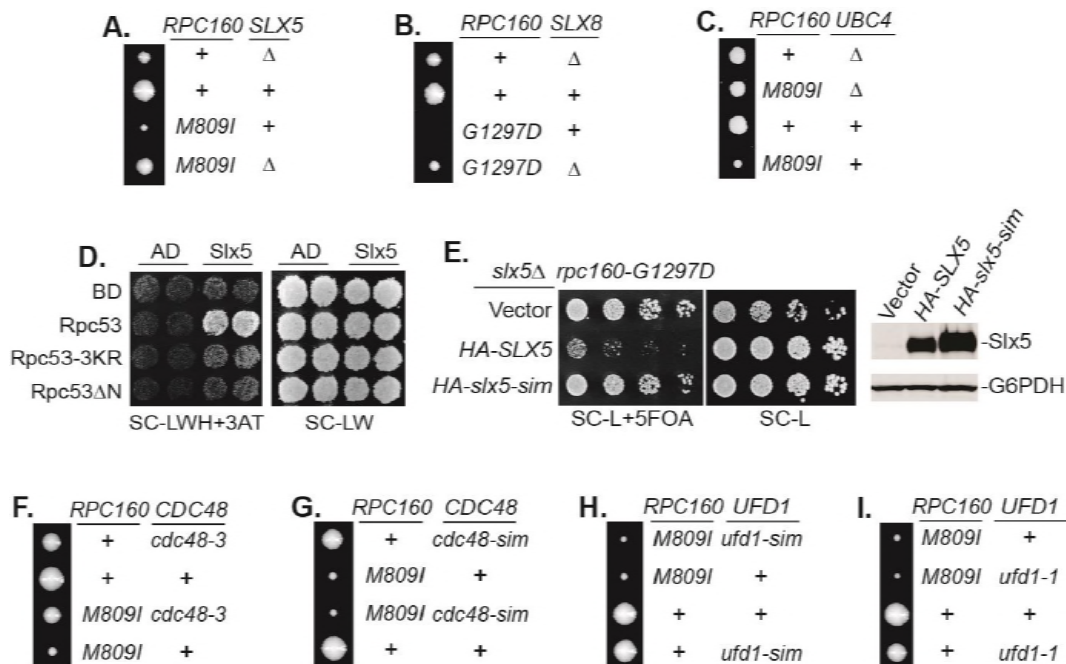

**Figure 4. Pol III is repressed by ubiquitylation and p97/Cdc48.** (A-C) The indicated *rpc160* mutant strains were crossed with *slx5Δ*, *slx8Δ*, or *ubc4Δ* strain, respectively, followed by tetrad analysis. The cross between *slx8Δ* and *rpc160-G1297D* was shown, because *slx8Δ* caused obvious growth defect by itself, so the rescue effect was more obvious on *rpc160-G1297D* which is a sicker mutant than *rpc160-M809I*. (D) Yeast two-hybrid interactions between Slx5 and Rpc53. *SLX5* and *RPC53* were cloned into a 2μ *LEU2* Gal4 activation-domain (AD) vector and a 2μ *TRP1* DNA-binding domain (BD) vector, respectively, and co-transformed into yeast strain PJ69-4A. Transformants were selected on synthetic media lacking leucine and tryptophan (SC-LW), then patched and replica plated to selective media lacking histidine to test for interactions. The histidine-lacking media was supplemented with 3-aminotriazole (SC-LWH+3AT) for a more stringent phenotype. (E) *LEU2* plasmids carrying HA-tagged wild type or SIM-defective *SLX5* (*HA-slx5-sim*) were transformed into an *rpc160-G1297D* *slx5Δ* strain containing a *URA3* *RPC160* plasmid. Transformants were selected on SC-L then spotted onto an SC-L+5FOA plate to lose wild type *RPC160*. *HA-SLX5* complemented *slx5Δ* so the cells became sicker compared to the empty vector control transformants, while *HA-slx5-sim* did not complement, indicating that the SIMs are essential for the function of *SLX5* in this assay. The lost Slx5 function by the SIM mutations was not caused by insufficient proteins, since there were comparable levels of Slx5 proteins, as determined by an anti-HA immunoblot on total cell lysates (right, top panel). G6PDH served as a loading control (right, bottom panel). (F-I) Tetrad analysis between *rpc160-M809I* and *cdc48-3*, *cdc48-sim*, *ufd1-sim*, and *ufd1-1*, respectively.

222 likely that Rpc53 sumoylation triggers a downstream event, such as STUbL-mediated  
223 ubiquitylation, which in turn represses Pol III. Indeed, the full repression of Pol III also requires  
224 ubiquitylation, as deletion of either one of the STUbL subunits (Slx5 and Slx8), or the Ubc4  
225 ubiquitin E2 enzyme could all rescue the growth defect caused by *rpc160* mutations (**Figure 4A,**  
226 **4B, and 4C**). Furthermore, we could detect a physical interaction between Slx5 and Rpc53 in a  
227 yeast two-hybrid assay, which required Rpc53 sumoylation, as the 3KR mutation or the N-  
228 terminal deletion of Rpc53 abolished this interaction (**Figure 4D**). Consistently, the SUMO-  
229 interacting motifs (SIMs) in Slx5 are required for it to repress Pol III, as expression of the Slx5  
230 SIM mutant did not rescue *rpc160* mutations in the *slx5Δ* strain (**Figure 4E**). These results are  
231 consistent with the STUbL activity of Slx5-Slx8 complex being important, and suggests that  
232 ubiquitylation acts downstream of sumoylation in Pol III repression.

233  
234 Sumoylated and ubiquitylated proteins can both be targeted by Cdc48, leading us to test whether  
235 it is required in this case. As expected, *rpc160-M809I* was similarly rescued by the *cdc48-3*  
236 mutation (**Figure 4F**). However, the SIMs in Cdc48 (**Figure 4G**) or its cofactor Ufd1 (**Figure**  
237 **4H**) were not required for its repressive effect, suggesting that Cdc48 activation does not occur  
238 through direct recognition of sumoylated Pol III complexes, but more likely through recognition  
239 of a ubiquitylated protein instead. The *ufd1-1* mutant has defects in the ubiquitin fusion  
240 degradation pathway (Johnson, Ma, Ota, & Varshavsky, 1995), but did not rescue *rpc160-M809I*  
241 (**Figure 4I**), suggesting Ufd1 is not the cofactor used by Cdc48 in this case.

242

### 243 **Pol III repression is partially mediated by ubiquitylation of Rpc160.**

244 It is conceivable that STUbL-mediated ubiquitylation represses Pol III by modifying components  
245 of the transcription machinery, including subunits of Pol III itself. We noticed that the mutant  
246 Rpc160-M809I proteins are less stable than wild type Rpc160, as determined by a  
247 cycloheximide-chase experiment (**Figure 5A**), suggesting the mutant Rpc160 proteins are  
248 degraded and therefore Rpc160 is likely to be ubiquitylated. Rpc160 can be ubiquitylated at  
249 1240, K1242, K1249, K1273, and K1432, as determined by a previous proteomic study (Swaney  
250 et al., 2013). When the three clustered lysines were mutated to arginines (K1240, 1242, 1249R or  
251 3KR), Rpc160-M809I proteins became more stable (**Figure 5A**) and the phenotypes of *rpc160-*  
252 *M809I*, including slow growth (**Figure 5B**) and reduced tRNA levels (**Figure 5C**), were partially

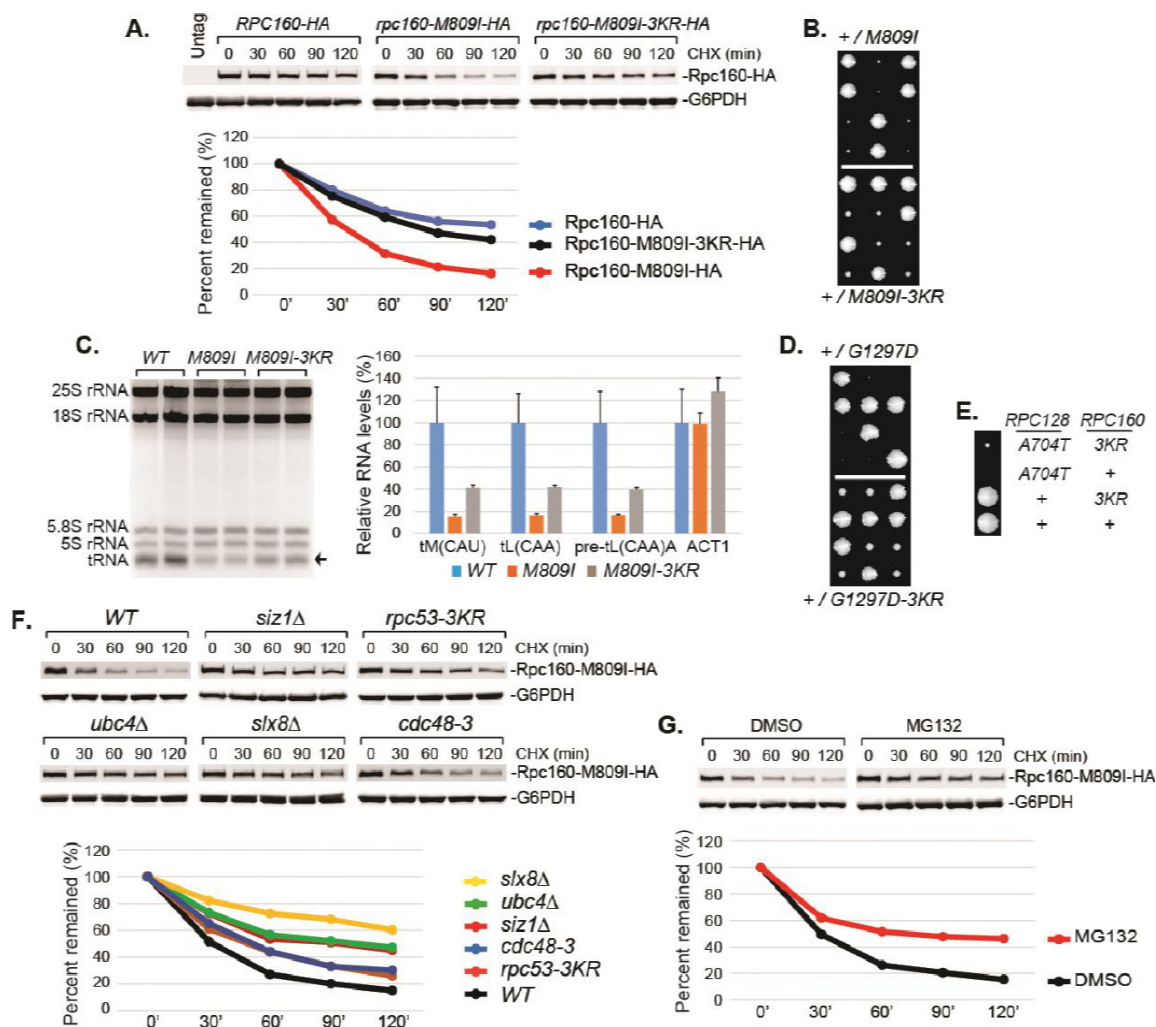

**Figure 5. Pol III repression by ubiquitylation is partially mediated through Rpc160.** (A) *CEN URA3* plasmids expressing HA-tagged wild type or mutant Rpc160, as indicated, were transformed into a wild type strain, and their stabilities were assayed during a cycloheximide (CHX) chase time course. Rpc160 was detected by an anti-HA antibody, and G6PDH was used as a loading control. Quantification of the bands was shown below the immunoblot. (B) Tetrad analysis of the diploid strains, *RPC160+/rpc160-M809I* (top) and *RPC160+/rpc160-M809I-3KR* (bottom). Tetrads from these two diploids were dissected and plated on the same YPD plate at the same time, in order to compare the growth of *rpc160-M809I* and *rpc160-M809I-3KR* cells. The growth of three dissected tetrads were shown. The large colonies are wild type *RPC160* cells, and the small colonies are *rpc160-M809I* (top) or *rpc160-M809I-3KR* (bottom) cells. The *rpc160-M809I-3KR* cells grew slightly faster than the *rpc160-M809I* cells. (C) Left: 2  $\mu$ g of RNA extracted from the indicated strains was run on a 2.8% agarose gel containing ethidium bromide, then visualized with UV. Two colonies were picked for each strain. Right: RNA from left was reverse transcribed into cDNA, followed by real-time PCR analysis, as described in Figure 2E. GAPDH transcripts were used as loading control. (D) Similar tetrad analysis as in (B) of the diploid strains, *RPC160+/rpc160-G1297D* (top) and *RPC160+/rpc160-G1297D-3KR* (bottom). Large colonies are wild type *RPC160* cells, while the missing colonies (top) are *rpc160-G1297D* cells, and the small colonies (bottom) are *rpc160-G1297D-3KR* cells. (E) An *rpc128-A704T* strain was crossed with an *rpc160-3KR* strain, followed by tetrad analysis. (F) A *CEN URA3 rpc160-M809I-HA* plasmid was transformed into the indicated strains, and the stabilities of the Rpc160-M809I-HA proteins were determined by CHX chase time course, as described in (A). (G) A *CEN URA3 rpc160-M809I-HA* plasmid was transformed into a wild type strain, and protein stabilities were determined by CHX chase experiment in the presence of DMSO or MG132.



254 rescued. The rescue effect was more obvious on the *rpc160-G1297D* mutant (**Figure 5D**).  
255 Interestingly, the 3KR mutation, when introduced into wild type Rpc160 proteins, could rescue  
256 the defect caused by mutations in a different Pol III component, such as *rpc128-A704T* (**Figure**  
257 **5E**). In addition, the Rpc160-M809I proteins were similarly stabilized in *siz1Δ*, *rpc53-3KR*,  
258 *ubc4Δ*, *slx8Δ* and *cdc48-3* cells (**Figure 5F**), as well as in the presence of a proteasome inhibitor,  
259 MG132 (**Figure 5G**). These results suggest that Rpc53 sumoylation leads to Rpc160  
260 ubiquitylation by the Slx5-Slx8 STUbL, which subsequently triggers Pol III disassembly by the  
261 Cdc48 segregase, and eventually results in Rpc160 degradation by the proteasome. The rescue  
262 by 3KR is partial, suggesting other ubiquitylation sites in Rpc160 and/or additional ubiquitylated  
263 proteins exist that play a role.

264

### 265 **Sumoylation and ubiquitylation of Pol III occur on the chromatin.**

266 Chromatin association of SUMO at tRNA genes was previously reported in yeast (Chymkowitch  
267 et al., 2017) and mammalian cells (Neyret-Kahn et al., 2013). It is thus possible that sumoylation  
268 and ubiquitylation of Pol III both occur on the chromatin. Indeed, we could detect an enrichment  
269 of Siz1, Slx5, as well as Cdc48-3 at tRNA genes, especially in the mutant *rpc160-M809I* cells  
270 (**Figure 6A, 6B, and 6C**). Chromatin association of wild type Cdc48 could not be detected (data  
271 not shown), possibly because it continuously disassembles the ubiquitylated Pol III complexes,  
272 releasing them as well as itself, from the chromatin. Surprisingly, Slx5 did not require its SIMs  
273 to associate with tRNA genes (**Figure 6B**), indicating the role of SUMO is not to recruit the  
274 STUbL to Pol III. Interestingly, however, the DNA-binding domain (SAP domain) of Siz1  
275 (Parker et al., 2008; Reindle et al., 2006) was required for its tRNA gene association (**Figure**  
276 **6A**). Furthermore, the SAP domain was also required for Siz1 to sumoylate Rpc53 (**Figure 6D**)  
277 and to inhibit the growth of the *rpc160* mutant cells (**Figure 6E**). Besides Siz1, the STUbL  
278 subunit Slx8 also contains a DNA-binding activity, which was mapped to the N-terminal 163  
279 amino acids (Yang, Mullen, & Brill, 2006). Similarly, Slx8 requires this DNA-binding domain to  
280 inhibit the growth of the *rpc160* mutant cells (**Figure 6F**). However, the DNA-binding domain is  
281 not required for Slx8 to associated with chromatin (data not shown), as previously reported  
282 (Yang et al., 2006). Therefore, the targeting of Pol III by SUMO and ubiquitin is likely to occur  
283 on the chromatin, and require a physical interaction between DNA and the modifying enzymes.

284



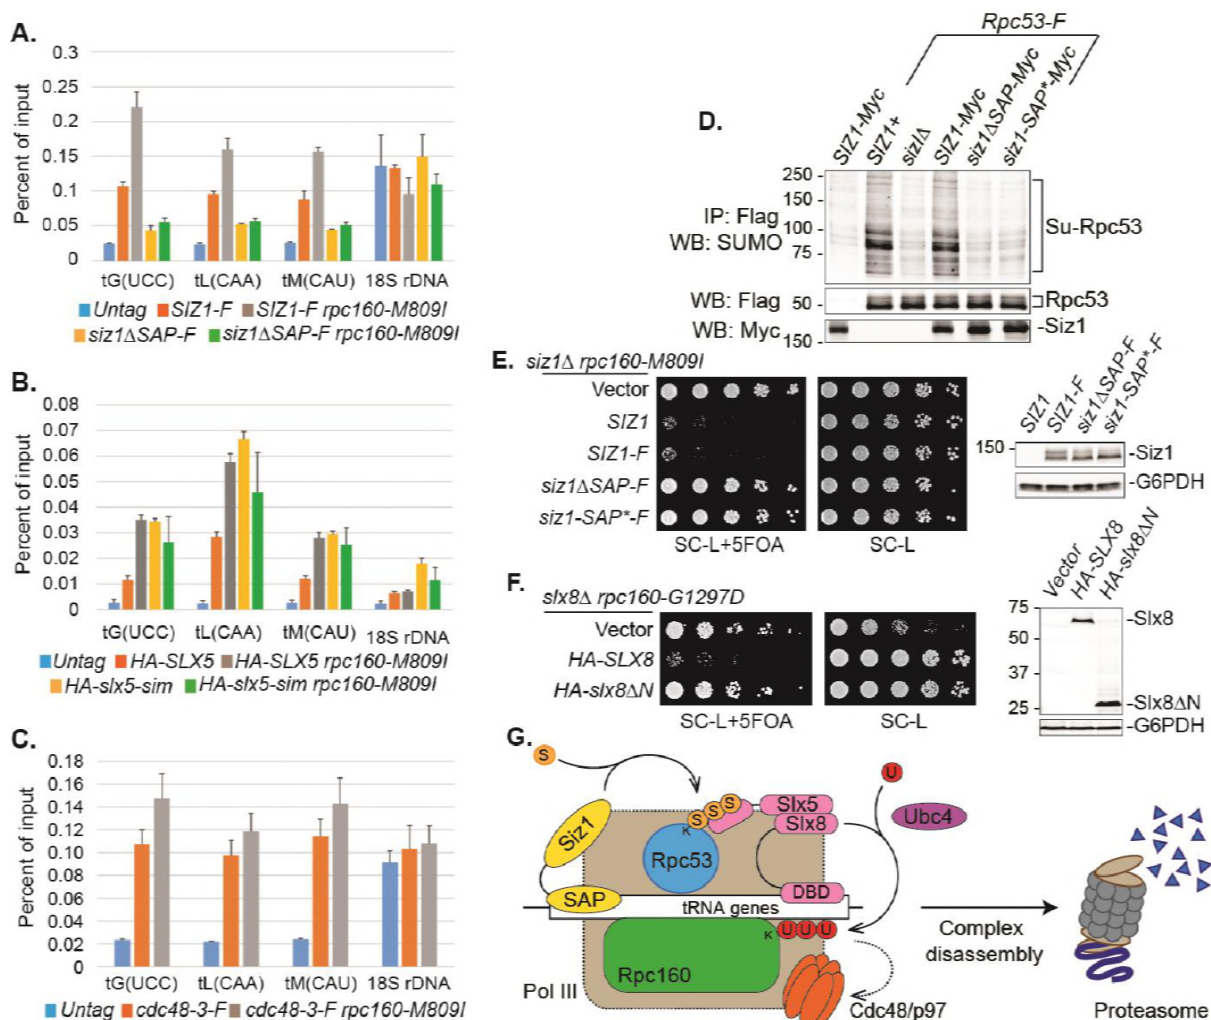

**Figure 6. DNA is involved in Pol III repression.** (A-C) Chromatin IP of Siz1-Flag, HA-Slx5, and Cdc48-3-Flag, respectively, using anti-Flag or anti-HA beads depending on the tag. An untagged strain was used as negative control. Chromatin association was determined by real-time PCR of the indicated genomic loci, using the percent of input method. Data are mean  $\pm$  standard deviation calculated from 6 data points (two biological replicates and three technical replicates). (D) Flag-tagged Rpc53 proteins were purified from the indicated wild type or *siz1* mutant strains, using anti-Flag beads, followed by SDS-PAGE and immunoblotting using an anti-SUMO antibody. Rpc53 was detected by an anti-Flag antibody, and Siz1 was detected by an anti-Myc antibody. Either truncation ( $\Delta$ SAP) or point mutation (SAP\*) of the SAP domain resulted in loss of Rpc53 sumoylation. (E) Left: *LEU2* plasmids carrying wild type or mutant *SIZ1* alleles were transformed into an *rpc160-M809I siz1Δ* strain containing a *URA3 RPC160* plasmid. Transformants were selected on SC-L plate, then spotted in 5-fold dilution onto a SC-L+5FOA plate. Wild type *SIZ1* complemented *siz1Δ* so the cells became sick on SC-L+5FOA plate, while the SAP mutants did not complement. Right: Comparable amounts of wild type and mutant Siz1 proteins were determined by anti-Flag immunoblotting on whole cell lysate, using G6PDH as loading control. (F) Similar plasmid shuffle experiment as in (E). *LEU2* plasmids carrying HA-tagged wild type *SLX8* or *slx8ΔN* ( $\Delta$ 2-163) were transformed into an *rpc160-G1297D slx8Δ* strain containing a *URA3 RPC160* plasmid. Wild type *SLX8* complemented *slx8Δ*, while *slx8ΔN* did not. Comparable amounts of Slx8 proteins were determined by an anti-HA immunoblot. (G) Model of Pol III regulation by SUMO, ubiquitin, and Cdc48. A stable interaction between chromatin and the SAP domain of Siz1 stimulates its activity to modify Rpc53 with SUMO (S). Rpc53 sumoylation triggers ubiquitin (U) modification of Rpc160 and potentially other proteins by the Slx5-Slx8 complex, which also required the interaction between chromatin and the DNA-binding domain (DBD) of Slx8. Ubiquitylation subsequently activates Cdc48 to disassemble the Pol III complex, facilitating degradation of Pol III subunits by the proteasome.

286

## 287 **DISCUSSION**

288 Sumoylation is a very common posttranslational modification, with thousands of identified  
289 sumoylation sites in mammalian cells. Deletion of the *UBC9* SUMO-conjugating enzyme gene is  
290 an embryonic lethal event in mice underscoring the importance of sumoylation (Nacerddine et  
291 al., 2005). However very few of the known sumoylation sites have been shown to have a  
292 functional consequence, because mutation of single sumoylation sites or even combinations in a  
293 protein usually results in no obvious phenotype. A possible explanation is provided by the  
294 “SUMO spray” model, which proposes that a locally concentrated SUMO E3 ligase sumoylates  
295 multiple proteins nearby, allowing SUMO to serve as a glue for protein complex assembly  
296 (Psakhye & Jentsch, 2012). In such cases, sumoylation on multiple proteins would need to be  
297 abolished simultaneously to reveal a phenotype, making genetic analysis of SUMO function  
298 more difficult. To address this challenge, we devised, a phenotype-based genetic screen that  
299 selects for point mutations in yeast whose growth is rescued only when sumoylation is  
300 compromised, allowing identification of proteins where sumoylation has a functional  
301 consequence that can then be studied.

302

### 303 **SUMO-ubiquitin-Cdc48 is a new regulatory pathway for Pol III**

304 We used a yeast genetic approach to uncover a functional relationship between Pol III and  
305 SUMO, demonstrating that genetics is a powerful tool to study sumoylation, complementary to  
306 the biochemical approach. Performing the same type of screen under different conditions is  
307 likely to yield more functional SUMO targets in the cell, and the same principle can be  
308 potentially extended to study other posttranslational forms. Our findings support a model where  
309 SUMO, ubiquitin, and Cdc48 act in a linear pathway to repress Pol III transcription (**Figure 6G**).  
310 In this model, a defective/stalled chromatin-associated Pol III complex on a tRNA gene is first  
311 recognized by the chromatin-associated Siz1 E3 SUMO ligase and sumoylated on the Rpc53  
312 subunit. Rpc53 sumoylation would then trigger ubiquitylation of the Rpc160 Pol III catalytic  
313 subunit, and possibly other proteins by the chromatin-associated Slx5-Slx8 SUMO-targeted E3  
314 ubiquitin ligase complex. Subsequently, ubiquitylated Pol III complexes are recognized and  
315 disassembled by the Cdc48 AAA-ATPase segregase, leading to proteasomal degradation of the  
316 Rpc160 subunit, thus clearing obstructed tRNA genes to allow transcription to resume. We

317 showed that this pathway is independent of the Mck1 and Kns1 kinases and Maf1, thus  
318 representing a new regulatory mechanism for Pol III. Interestingly, SUMO was recently shown  
319 to promote Pol III assembly and activity by modifying another subunit, Rpc82 (Chymkowitch et  
320 al., 2017), suggesting that SUMO modification has complex regulatory effects on Pol III. By  
321 modifying different components of the Pol III machinery, SUMO may regulate Pol III at  
322 multiple transcription steps or in response to various signaling events.

323

324 **The SUMO-ubiquitin-Cdc48 pathway may serve as a quality control mechanism for Pol III**

325 In the particular case reported here, the SUMO-ubiquitin-Cdc48 pathway seems to preferentially  
326 target defective Pol III, based on the results that *siz1Δ* only has an obvious effect when the  
327 function of Pol III is impaired, that more Siz1, Slx5, and Cdc48 proteins are associated with  
328 tRNA genes, and that Rpc53 is more extensively sumoylated in mutant *rpc160* cells. The  
329 question is, what Pol III defect is being recognized by the pathway? Since mutations in the Pol  
330 III initiation factors Brf1, Tfc1, and Tfc6 can also be rescued by disrupting sumoylation, it is  
331 likely that a defect in transcription initiation is being recognized. This is supported by the result  
332 that *siz1Δ* rescued an initiation-defective mutant, *rpc31-236*. In Rpc160, the mutations T379I  
333 (close to the catalytic site), A880T (in bridge helix), and G1098T (in trigger loop) (Hoffmann et  
334 al., 2015) are likely to impair elongation, suggesting elongation defects might also be a feature  
335 recognized by the SUMO-ubiquitin-Cdc48 pathway. Consistently, two previously characterized  
336 elongation mutants, *rpc160-112* and *rpc160-270*, were both rescued by *siz1Δ*.

337

338 The next question is, how are initiation- and elongation-defective Pol III proteins targeted by the  
339 pathway? Our data imply that it is the whole Pol III complex rather than individual subunits that  
340 are targeted for repression. For instance, sumoylated Rpc53 was co-purified with Rpc160,  
341 suggesting it exists in the complex. In addition, when a mutation occurs in one subunit (e.g.  
342 Rpc128), SUMO and ubiquitin are conjugated to different subunits (Rpc53 and Rpc160,  
343 respectively), instead of Rpc128 itself, and the mutant Rpc128 proteins did not become unstable  
344 (data not shown). It is possible that SUMO and ubiquitin recognize overall conformational  
345 changes in the Pol III protein complex caused by a defective subunit, but we favor another  
346 possibility that involves chromatin DNA. It is conceivable that initiation or elongation defects  
347 will trap Pol III on the chromatin, forming a relatively stable protein/DNA complex. It would be

348 a more efficient way to distinguish defective Pol III from normal Pol III molecules by utilizing  
349 the stable interaction between the E3 ligases and chromatin DNA, rather than by recognizing  
350 conformational changes. In fact, Siz1, Slx5, and Cdc48 are all associated with tRNA genes, and  
351 both Siz1 and Slx8 contain DNA-binding domains that are required for them to repress Pol III.  
352 The requirement of the DNA-binding activities in Siz1 and Slx8 is somewhat surprising, since no  
353 functional consequences have been reported when they are disrupted. Specifically, the SAP-  
354 truncated version of Siz1 can still sumoylate PCNA and maintain the DNA-damage sensitivity of  
355 the *rad18* mutant, which can be reversed by complete deletion of *SIZ1* (Parker et al., 2008).  
356 Similarly, deleting the N-terminal DNA-binding domain of Slx8 does not affect its ability to  
357 associate with chromatin (Yang et al., 2006), or to complement the *slx8Δ* synthetic lethal  
358 phenotype with *sgs1Δ*. Therefore, the requirement for DNA-binding activity may indicate a role  
359 of SUMO and ubiquitin in a process other than the DNA damage response or genome stability  
360 maintenance.

361  
362 Unlike the SAP domain in Siz1, the SIMs in Slx5 and the DNA-binding domain in Slx8 are not  
363 required for their chromatin association at tRNA genes, suggesting that their main function is not  
364 to recruit STUbL to Pol III. Instead, they may provide important docking sites to position the  
365 enzyme in the right orientation relative to the substrate in order for it to ubiquitylate a specific  
366 target subunit in Pol III. It is thus possible that the STUbL can travel with sumoylated Pol III  
367 without ubiquitylating the polymerase until Pol III is somehow trapped on the chromatin, which  
368 will allow STUbL to stably bind to DNA and activate its ligase activity. Therefore, Rpc53  
369 sumoylation itself will not be sufficient to trigger ubiquitylation to inhibit Pol III. This is  
370 supported by the finding that SUMO-fused Rpc53 did not affect cellular growth (**Figure 3G**),  
371 even though the N-terminal SUMO fusion could functionally replace sumoylation on the natural  
372 modification sites (K51, K115, and K236) (**Figure 3F**). These results also suggest that  
373 sumoylation may not activate Cdc48 directly, but rather indirectly through ubiquitylation.  
374 Consistently, the SUMO-interacting activities of Cdc48 and its cofactor Ufd1 were not required  
375 for Pol III repression, although how Cdc48 is activated and what cofactors are required for  
376 Cdc48 in this case remain to be answered.

377  
378 Taken together, we propose that SUMO, ubiquitin, and Cdc48 act in a sequential manner, and

379 that together with the additional requirement of DNA-binding activities, they confer substrate  
380 specificity to restrict ubiquitylation, as well as subsequent complex disassembly and proteasomal  
381 degradation, only towards transcriptionally defective Pol III, while leaving normal Pol III  
382 unaffected. To further test our hypothesis, in vitro sumoylation, ubiquitylation, and Pol III  
383 transcription assays with purified proteins are required.

384

385 **The SUMO-ubiquitin-Cdc48 pathway is a potential target for Pol III-related human**  
386 **diseases.**

387 Given the fact that Pol III, sumoylation, ubiquitylation, and Cdc48 are all conserved from yeast  
388 to humans, this new Pol III regulatory mechanism is likely to be conserved as well. In fact,  
389 proteomic studies of sumoylation in mammalian cells have identified sumoylated proteins in Pol  
390 III, including four Pol III-specific subunits and two subunits shared by Pol I and/or Pol II (**Table**  
391 **S4**) (Hendriks et al., 2014; Lamoliatte et al., 2014; Tammsalu et al., 2014). By comparison, only  
392 three subunits for each of Pol I and Pol II were found to be sumoylated, suggesting Pol III is the  
393 major SUMO target among the three polymerases. This correlates with the specific genetic  
394 relationship between SUMO and Pol III observed in yeast, namely that *siz1Δ* only rescued  
395 mutations in Pol III but not those in Pol I or Pol II. Interestingly, RPC4, the human homologue of  
396 yeast Rpc53, seems to be the most prevalent sumoylated protein among all human RNA  
397 polymerase subunits, with a total number of 10 sumoylation sites combining all three datasets.  
398 Mutations in Pol III cause neurodegenerative disorders in humans (Bernard et al., 2011; Borck et  
399 al., 2015; Saito et al., 2011; Shimojima et al., 2014; Synofzik et al., 2013; Terao et al., 2012;  
400 Tetreault et al., 2011; Thiffault et al., 2015). We showed, interestingly, that the phenotypes  
401 caused by a subset of these Pol III disease mutations, when introduced into yeast cells, were  
402 rescued when sumoylation was disrupted (**Figure S3 and Table S3**). In addition, the fibroblasts  
403 derived from a patient carrying Pol III mutations exhibited reduced levels of tRNA (data not  
404 shown), as is the case in yeast. It is thus intriguing to speculate that sumoylation, ubiquitylation,  
405 and Cdc48 segregase can all be potential therapeutic targets for the neurodegenerative disease  
406 caused by Pol III mutations. The next step is to determine if this regulatory mechanism is  
407 conserved in humans, by testing it in cultured mammalian cells and mouse model systems. We  
408 have shown that the yeast growth assay is a convenient tool to determine which  
409 neurodegenerative disease mutations are likely to cause a phenotype and therefore, which should



410 be chosen to create cell lines and mouse models. It is possible to differentiate iPSC lines into  
411 myelinating oligodendrocytes in vitro (Kerman et al., 2015), and the oligodendrocytes from Pol  
412 III patients are expected to display a myelination defect. Alternatively, a cell line can be made to  
413 carry a lethal mutation in one copy of a Pol III subunit gene while leaving the wild type copy  
414 under control of an inducible promoter. Such a cell line can be adapted for high-throughput  
415 chemical screens for inhibitors against sumoylation, ubiquitylation, or Cdc48, which can not  
416 only be used as research tools, but also be developed into potential therapies for Pol III-related  
417 disorders or other human diseases involving SUMO, ubiquitin, or Cdc48, such as cancer (Kessler  
418 et al., 2012). A genetically modified mouse model will eventually be needed to recapitulate the  
419 disease and test the effect of the inhibitors.

420

## 421 **EXPERIMENTAL PROCEDURES**

### 422 Yeast strains, plasmids, media, and genetic methods

423 The *Saccharomyces cerevisiae* strains and plasmids used in this study are listed in **Table S5**  
424 **and Table S6**, respectively. All media used, including rich YPD medium (yeast extract-peptone-  
425 dextrose), sucrose medium (yeast extract-peptone-Suc), synthetic complete (SC) drop-out  
426 medium (for example, SC-U), SC-galactose medium and sporulation medium, were made as  
427 described previously (Rose, 1990). SC-L+5FOA plates were made as standard SC drop-out  
428 medium, but using 2 g of SC-UL drop-out mix, plus 50 mg of uracil, and 1 g of 5FOA per 1 liter  
429 of total volume. For a more stringent yeast two-hybrid interaction signal, 24  $\mu\text{mol}$  of 3-  
430 aminotriazole (3AT) was spread onto a 10 cm SC-LWH plate. Standard genetic methods for  
431 mating, sporulation, transformation, and tetrad analysis were used throughout this study. In the  
432 tetrad analysis experiments, the mutant haploid *rpc160* or *rpc128* strains contain a *URA3* vector  
433 carrying wild type copy of gene, in order to maintain the strains. The *URA3* plasmids were lost  
434 from the diploid cells on 5FOA media after mating and before sporulation. The similar strategy  
435 was used in the plasmid shuffle experiments, for example, in **Figure 2A**, where the starting  
436 *rpc160 $\Delta$*  strain contains a *URA3 RPC160* plasmid. Upon transformation with *LEU2* plasmids  
437 carrying *rpc160* mutant alleles, the transformants were plated onto 5FOA-containing media to  
438 lose the *URA3 RPC160* plasmid. Growth on 5FOA media therefore reflects the growth  
439 phenotype of the *rpc160* mutants present on the *LEU2* plasmids.

440 The mutations in *slx5-sim* are: <sup>24</sup>VILI – VAAA, <sup>93</sup>ITII – ATAA, <sup>116</sup>YVDL – YAAA, and  
441 <sup>155</sup>LTIV – ATAA. The *siz1ΔSAP* and *siz1-SAP\** mutations were made as previously described  
442 (Parker et al., 2008).

443

#### 444 Design of the reverse suppressor screen of *SMT3-Q56K*.

445 The starting strain is ZOY261 (*ade2 ade3 ura3 leu2 trp1 can1Δ::FUR1::natMX4*) carrying  
446 two plasmids, pZW321 (*CEN URA3 ADE3 SMT3-Q56K*) and pAK12-1 (*CEN TRP1 ade3-pink*)  
447 (Koren, Ben-Aroya, Steinlauf, & Kupiec, 2003), and grown on SC-Leu-Trp in order to keep the  
448 plasmids. Wild type yeast cells are white, while *ade2* mutant is red. *ade3* mutation suppresses  
449 *ade2*, so that *ade2 ade3* double mutant is white. Both *ade2* and *ade3* are recessive, so in the  
450 presence of pZW321, ZOY261 colonies are red. The starting strain (ZOY261 + pZW321 +  
451 pAK12-1), if grown on YPD, does not need pZW321 for viability, so the cells will lose the  
452 plasmid during cell proliferation, eventually forming colonies with red and white sectors. The  
453 screen looks for mutations that cause sickness or lethality, but can be suppressed / rescued by  
454 *SMT3-Q56K* on pZW321. These mutants will appear as uniformly red colonies, because they  
455 always need to keep pZW321 for viability. They will also be sensitive to 5FOA, because 5FOA  
456 counter-selects against *URA3* on pZW321.

457 To perform the screen, cells were mutagenized with 3% ethyl methanesulfonate (EMS),  
458 washed, and then spread onto YPD plates at 30°C to allow formation of single colonies.  
459 Uniformly red colonies were first picked and restreaked on fresh YPD plates. The clones  
460 remaining uniformly red after restreak were subsequently screened for those that are 5FOA-  
461 sensitive. The red 5FOA-sensitive colonies could also come from mutations that are synthetic  
462 lethal with the *ura3* or *ade3* alleles, as pZW321 also carries wild type *URA3* and *ADE3*. To  
463 reduce the chance of isolating these undesired mutations, two modifications were made. First, an  
464 additional copy of wild type *FUR1* gene was integrated at the *CAN1* gene locus of the starting  
465 strain, because *ura3* synthetic lethal mutations are most frequently found in *FUR1* (Koren et al.,  
466 2003). Second, the pAK12-1 plasmid carrying an *ade3-pink* allele was co-transformed with  
467 pZW321 into ZOY261. Unlike wild type *ADE3*, the *ade3-pink* allele is partially functional, but  
468 confers a pink (instead of red) colony color phenotype in *ade2 ade3* background (Koren et al.,  
469 2003). Therefore, in the presence of pAK12-1, the *ade3* synthetic lethal mutants will not appear  
470 as uniformly red colonies, but sectorized with red and pink instead. To finally confirm that a strain

471 contains a *SMT3-Q56K*-rescuable mutation, the strain was transformed with the pZW311  
472 plasmid (*CEN LEU2 SMT3-Q56K*), which should render the cells resistant to 5FOA after  
473 transformation.

474 To identify the mutated gene, a wild type genomic DNA library (Jones et al., 2008) was  
475 transformed into the candidate strains, and screened for 5FOA-resistant transformants. The  
476 plasmids were then isolated and sequenced to identify the ends of the genomic DNA on the  
477 plasmids. The mutated genes were identified by subcloning or by complementation experiments.  
478 The genomic mutations were finally confirmed by PCR and sequencing. To summarize, ~80,000  
479 colonies were initially screened, and 740 uniformly red ones were picked and restreaked. 105  
480 clones remained red after restreak, among which 77 were 5FOA-sensitive. Finally, 25 of these 77  
481 clones were confirmed to have mutations that can be suppressed by *SMT3-Q56K* (**Table 1**).

482

#### 483 Preparation of RNA from yeast cells.

484 RNA was prepared by the “Heat/Freeze” method as previously described with  
485 modifications (Schmitt, Brown, & Trumpower, 1990). Briefly, yeast cells were resuspended in  
486 AE buffer (50 mM NaOAc pH 5.2, 10 mM EDTA, 1% SDS), mixed with equal volume of  
487 phenol (pH 4.5), then incubated at 65°C for 4 min. The cell suspension was then frozen on dry  
488 ice/ethanol bath and thawed at 37°C. After centrifugation at top speed, the RNA containing  
489 upper layer was transferred to a new tube. RNA was extracted first with  
490 phenol/chloroform/isoamyl alcohol (25:24:1), then with chloroform/isoamyl alcohol (24:1), and  
491 finally precipitated with 100% ethanol containing 0.3M NaOAc (pH 5.2). The RNA pellet was  
492 washed once with 70% ethanol and once with 100% ethanol, then dissolved in DEPC-treated  
493 H<sub>2</sub>O at 50°C for 10 min.

494

#### 495 Reverse transcription and real-time PCR analysis.

496 RNA was converted into DNA using the SuperScript III RT kit (Invitrogen, catalog #  
497 18080-051) with modifications. First, a mixture of random hexamer and tRNA gene-specific  
498 primers (**Table S7**) was used for reverse transcription. Second, primers were hybridized to RNA  
499 by incubating the sample at 100°C for 5 min, followed by 65°C for 5 min, then held at 55°C.  
500 Third, the RT enzyme mix was pre-warmed to 55°C before adding to the RNA/primer mix.  
501 Fourth, reverse transcription was carried out at 55°C for 30 min, followed by 85°C for 5 min,

502 and finally held at 4°C. The resulting DNA was diluted 10 times with H<sub>2</sub>O, and 2 µl of the  
503 diluted DNA was used for real-time PCR. Real-time PCR was performed with SYBR Green  
504 master mix (Applied Biosystems, catalog # 4367659) on the Applied Biosystems 7900HT Fast  
505 Real-Time PCR System. Data were analyzed by the comparative C<sub>T</sub> method (Schmittgen &  
506 Livak, 2008), using GAPDH as internal control. Primer sequences were listed in **Table S6**. Data  
507 are mean ± standard deviation calculated from 6 data points (two biological replicates and three  
508 technical replicates), presented as relative amount compared to wild type.

509

#### 510 Preparation of protein extracts and immunoprecipitation (IP).

511 For IPs, crude protein extracts were prepared by the glass bead beating method, as described  
512 above (Z. Wang & Prelich, 2009). Briefly, cells were first resuspended in lysis buffer containing  
513 50 mM Tris-Cl (pH 8.0), 10 mM MgCl<sub>2</sub>, 1 mM EDTA, 150 mM NaCl, 1 mM  
514 phenylmethylsulfonyl fluoride (PMSF), 50 mM *N*-ethylmaleimide (NEM), 1% Triton X-100,  
515 and protease inhibitors (Roche, catalog # 11836170001), and glass beads. Cell lysis was  
516 subsequently performed on a Precellys 24 tissue homogenizer (setting 6500, 30 sec for 3 times),  
517 followed by centrifugation to clear the lysate. IP was performed with anti-HA agarose (Sigma,  
518 catalog #A2095) or anti-Flag-agarose (Sigma, catalog # A2220) at 4°C for a typical length of 2  
519 hr, and the bound proteins were eluted with 2x HA or 2x Flag peptide, respectively.

520 For the CHX chase experiments in **Figure 5** and the immunoblotting in **Figure 6E and 6E**,  
521 protein extracts were prepared by the post-alkaline extraction method, as previously described  
522 (Zhang et al., 2011). Briefly, 1-2 O.D. of cells were first washed with 1 ml of water, then  
523 resuspended in 200 µl 2M LiOAc and incubated on ice for 5 min. The cells were subsequently  
524 resuspended in 200 µl 0.4M NaOH and incubated on ice for another 5 min, before finally being  
525 resuspended in 40 µl Laemmli's buffer and incubated at 100°C for 5 min. 10 µl of protein  
526 sample were loaded on the gel.

527

#### 528 Assays of protein stability

529 Yeast cultures were grown overnight at 30°C to log phase. Cell concentrations were then  
530 adjusted to OD<sub>600</sub> = 1. To start the chase, 50 mg/ml cycloheximide (Sigma, #C7698) was added  
531 to a final concentration of 0.5 mg/ml. 1.5 ml culture was collected immediately as time point 0 in  
532 an Eppendorf tube pre-loaded with 15 µl 10% sodium azide. Cells were then washed with 1 ml

533 water and frozen on dry ice. The remaining cultures were incubated at 30°C, and 1.5 ml samples  
534 were collected every 30 min in the same way. Crude extracts were prepared by the post-alkaline  
535 extraction method as described above. An anti-G6PDH (Sigma, #A9521) antibody was used to  
536 detect G6PDH as loading control. Immunoblot analysis was performed using the Odyssey  
537 infrared imaging system (*LI-COR* Biosciences).

538

#### 539 2-step immunoprecipitation to isolate Pol III-associated sumoylated proteins.

540 Flag-tagged Rpc160 was first purified by incubating with anti-Flag M2 affinity gel (Sigma,  
541 catalog # A2220) in lysis buffer, then eluted with 450 ng/μl 2x Flag peptide in GFP-IP buffer (50  
542 mM Tris-Cl (pH 7.5), 1 mM EDTA, 500 mM NaCl, 1 mM PMSF, 50 mM NEM, and protease  
543 inhibitors). For the second step, the Flag-eluted protein sample was incubated with GFP-Trap  
544 agarose beads (ChromoTek, catalog # gta-10), followed by two washes with GFP-IP buffer, one  
545 quick wash with PBS containing 8 M urea and 1% SDS, and one with PBS containing 1% SDS.  
546 GFP-tagged proteins were eventually eluted with 2x Laemmli's buffer (without dye) at 100°C  
547 for 5 min, and analyzed by mass-spectrometry. Immunoprecipitated samples were analyzed by  
548 SDS-PAGE, followed by immunoblotting with an anti-SUMO antibody (Santa Cruz, Smt3 (y-  
549 84), catalog # sc-28649) or an anti-Flag M2 antibody (Sigma). The *SLX5* gene was deleted from  
550 the strains in Figure 3A, in order to increase general sumoylation signal (Z. Wang et al., 2006; Z.  
551 Wang & Prelich, 2009).

552

#### 553 Mass spectrometry analysis

554 Samples were first denatured in 8 M urea and then reduced and alkylated with 10 mM Tris  
555 (2-carboxyethyl) phosphine hydrochloride [Roche Applied Science] and 55 mM iodoacetamide  
556 [Sigma-Aldrich] respectively. Samples were then digested over-night with trypsin [Promega]  
557 according to the manufacturer's specifications. The protein digests were pressure-loaded onto  
558 250 micron i.d. fused silica capillary [Polymicro Technologies] columns with a Kasil frit packed  
559 with 3 cm of 5 micron C18 resin [Phenomenex]. After desalting, each loading column was  
560 connected to a 100 micron i.d. fused silica capillary [Polymicro Technologies] analytical column  
561 with a 5 micron pulled-tip, packed with 12 cm of 5 micron C18 resin [Phenomenex].

562 Each split column was placed in line with an 1100 quaternary HPLC pump [Agilent  
563 Technologies] and the eluted peptides were electrosprayed directly into an Orbitrap Elite mass



564 spectrometer [Thermo Scientific]. The buffer solutions used were 5% acetonitrile/0.1% formic  
565 acid (buffer A) and 80% acetonitrile/0.1% formic acid (buffer B). The 120 min elution gradient  
566 had the following profile: 10% buffer B beginning at 10 min to 45% buffer B at 90 min, and then  
567 100% buffer B at 100 min continuing to 110 min. A cycle consisted of one full scan mass  
568 spectrum (300-1600 m/z) in the Orbitrap at 120,000 resolution followed by 15 data-dependent  
569 collision induced dissociation (CID) MS/MS spectra in the ion trap. Charge state screening was  
570 enabled and unassigned charge states and charge state 1 were rejected. Dynamic exclusion was  
571 enabled with a repeat count of 1, a repeat duration of 30 sec, an exclusion list size of 500 and an  
572 exclusion duration of 120 sec. Dynamic exclusion early expiration was enabled with an  
573 expiration count of 3 and an expiration signal-to-noise ratio of 3. Application of mass  
574 spectrometer scan functions and HPLC solvent gradients were controlled by the Xcalibur data  
575 system [Thermo Scientific].

576 MS/MS spectra were extracted using RawXtract (version 1.9.9.2) (McDonald et al., 2004).  
577 MS/MS spectra were searched with the ProLuCID (version 1.3.5) algorithm (Xu et al., 2015)  
578 against a *Saccharomyces* Genome Database (SGD) protein database downloaded on 01-05-2010  
579 that had been concatenated to a decoy database in which the sequence for each entry in the  
580 original database was reversed (Peng, Elias, Thoreen, Licklider, & Gygi, 2003). A total of  
581 13,434 protein entries were searched. Precursor mass tolerance was 50 ppm and fragment mass  
582 tolerance was 600 ppm. For protein identifications, the ProLuCID search was performed using  
583 no enzyme specificity and static modification of cysteine due to carboxyamidomethylation  
584 (57.02146). ProLuCID search results were assembled and filtered using the DTASelect (version  
585 2.1.3) algorithm (Tabb, McDonald, & Yates, 2002), requiring full enzyme specificity (cleavage  
586 C-terminal to Arg or Lys residue) and a minimum of one peptide per protein identification. The  
587 number of missed cleavages was not specified. The protein identification false positive rate was  
588 kept below one percent and all peptide-spectra matches had less than 10 ppm mass error.  
589 DTASelect assesses the validity of peptide-spectra matches using the cross-correlation score  
590 (XCORR) and normalized difference in cross-correlation scores (deltaCN). The search results are  
591 grouped by charge state and tryptic status and each sub-group is analyzed by discriminant  
592 analysis based on a non-parametric fit of the distribution of forward and reversed matches.

593

594 Chromatin immunoprecipitation (ChIP) and real-time PCR analysis

595 ChIPs were performed as previously described (Keogh, Podolny, & Buratowski, 2003).  
596 Yeast cells were grown over night at 30°C to log phase. Formaldehyde was added to a final  
597 concentration of 1% for 20 min at room temperature, and the reaction was quenched by the  
598 addition of glycine to 0.3 M. Cells were washed twice with Tris-buffered saline, and lysed with  
599 glass beads in FA lysis buffer containing 50 mM Tris-Cl (pH 8.0), 10 mM MgCl<sub>2</sub>, 1 mM EDTA,  
600 150 mM NaCl, 1 mM phenylmethylsulfonyl fluoride (PMSF), 50 mM *N*-ethylmaleimide (NEM),  
601 1% Triton X-100, 0.1% SDS, 0.1% sodium deoxycholate, and protease inhibitors (Roche,  
602 catalog # 11836170001). Chromatin was sheared by sonication until the average fragment size  
603 was between 200 and 500 bp.

604 Immunoprecipitation was performed over night at 4°C with anti-HA or anti-Flag agarose.  
605 The bound materials were eluted with 2x HA or 2x Flag peptide, followed by RNase A and  
606 protease K treatment to de-crosslink. Bound DNA was then purified with the Qiagen PCR  
607 purification kit, and analyzed by real-time PCR, as described above. Data are mean ± standard  
608 deviation calculated from 6 data points (two biological replicates and three technical replicates),  
609 using the percent of input method. An untagged strain was used as negative control. The  
610 sequences of the primers were listed in **Table S7**.

611

## 612 **AUTHOR CONTRIBUTIONS**

613 Z.W. and T.H designed the experiments. C.W. performed the reversed suppressor screen. A.A.  
614 and J.R.Y performed M/S analysis. Z.W. and T.H. wrote the manuscript. T.H. supervised the  
615 study.

616

## 617 **ACKNOWLEDGEMENTS**

618 We thank Gregory Prelich for the SUMO pathway mutant plasmids and strains and the wild type  
619 genomic DNA library, Martin Kupiec for the *ade3-pink* plasmid, Michel Werner for the *rpc160*  
620 and *rpc31* mutant plasmids, Vicki Lundblad for sharing yeast vectors and equipment, and Jill  
621 Meisenhelder for the 2x Flag peptide. We also thank Benoit Coulombe and Genevieve Bernard  
622 for sharing unpublished data on Pol III-related diseases, as well as Ian Willis, Alessandro  
623 Vannini, Gregory Prelich, and members of the Hunter lab for constructive discussions. This  
624 study was supported by NIH grants #CA080100, CA082683 and CA014195 to T.H., NCCR  
625 grant #5P41RR011823-17 and NIGMS grant #8P41GM103533-17 to J.R.Y., the Helmsley

626 Center for Genomic Medicine, and the Functional Genomics Core at the Salk Institute. T.H.  
627 holds the Renato Dulbecco Chair in Cancer Research, and is a Frank and Else Schilling  
628 American Cancer Society Professor.

629

### 630 **COMPETING INTERESTS**

631 The authors declare no competing interests.

632

### 633 **REFERENCES**

634

635 **Bergink, S., Ammon, T., Kern, M., Schermelleh, L., Leonhardt, H., & Jentsch, S. (2013).**  
636 **Role of Cdc48/p97 as a SUMO-targeted segregase curbing Rad51-Rad52**  
637 **interaction. *Nat Cell Biol*, 15(5), 526-532. doi: 10.1038/ncb2729**

638 **Bernard, G., Chouery, E., Putorti, M. L., Tetreault, M., Takanohashi, A., Carosso, G., . . .**  
639 **Brais, B. (2011). Mutations of POLR3A encoding a catalytic subunit of RNA**  
640 **polymerase Pol III cause a recessive hypomyelinating leukodystrophy. *Am J Hum***  
641 ***Genet*, 89(3), 415-423. doi: S0002-9297(11)00308-9 [pii]**  
642 **10.1016/j.ajhg.2011.07.014**

643 **Boguta, M. (2013). Maf1, a general negative regulator of RNA polymerase III in yeast.**  
644 ***Biochim Biophys Acta*, 1829(3-4), 376-384. doi: 10.1016/j.bbagr.2012.11.004**

645 **Borck, G., Hog, F., Dentici, M. L., Tan, P. L., Sowada, N., Medeira, A., . . . Kubisch, C.**  
646 **(2015). BRF1 mutations alter RNA polymerase III-dependent transcription and**  
647 **cause neurodevelopmental anomalies. *Genome Research*. doi: 10.1101/gr.176925.114**

648 **Chiu, Y. H., Macmillan, J. B., & Chen, Z. J. (2009). RNA polymerase III detects cytosolic**  
649 **DNA and induces type I interferons through the RIG-I pathway. *Cell*, 138(3), 576-**  
650 **591. doi: 10.1016/j.cell.2009.06.015**

651 **Chymkowitz, P., Ngueta, P. A., Aanes, H., Robertson, J., Klungland, A., & Enserink, J. M.**  
652 **(2017). TORC1-dependent sumoylation of Rpc82 promotes RNA polymerase III**  
653 **assembly and activity. *Proc Natl Acad Sci U S A*, 114(5), 1039-1044. doi:**  
654 **10.1073/pnas.1615093114**

655 **Desai, N., Lee, J., Upadhyaya, R., Chu, Y., Moir, R. D., & Willis, I. M. (2005). Two steps in**  
656 **Maf1-dependent repression of transcription by RNA polymerase III. *J Biol Chem*,**  
657 **280(8), 6455-6462. doi: 10.1074/jbc.M412375200**

658 **Dieci, G., Hermann-Le Denmat, S., Lukhtanov, E., Thuriaux, P., Werner, M., & Sentenac,**  
659 **A. (1995). A universally conserved region of the largest subunit participates in the**  
660 **active site of RNA polymerase III. *EMBO J*, 14(15), 3766-3776.**

- 661 **Fernandez-Tornero, C., Moreno-Morcillo, M., Rashid, U. J., Taylor, N. M., Ruiz, F. M.,**  
662 **Gruene, T., . . . Muller, C. W. (2013). Crystal structure of the 14-subunit RNA**  
663 **polymerase I. *Nature*, 502(7473), 644-649. doi: 10.1038/nature12636**
- 664 **Geiduschek, E. P., & Kassavetis, G. A. (2001). The RNA polymerase III transcription**  
665 **apparatus. *J Mol Biol*, 310(1), 1-26. doi: 10.1006/jmbi.2001.4732**
- 666 **Hendriks, I. A., D'Souza, R. C., Yang, B., Verlaan-de Vries, M., Mann, M., & Vertegaal, A.**  
667 **C. (2014). Uncovering global SUMOylation signaling networks in a site-specific**  
668 **manner. *Nat Struct Mol Biol*. doi: 10.1038/nsmb.2890**
- 669 **Hoffmann, N. A., Jakobi, A. J., Moreno-Morcillo, M., Glatt, S., Kosinski, J., Hagen, W. J., .**  
670 **. . Muller, C. W. (2015). Molecular structures of unbound and transcribing RNA**  
671 **polymerase III. *Nature*, 528(7581), 231-236. doi: 10.1038/nature16143**
- 672 **Johnson, E. S., & Blobel, G. (1997). Ubc9p is the conjugating enzyme for the ubiquitin-like**  
673 **protein Smt3p. *J Biol Chem*, 272(43), 26799-26802.**
- 674 **Johnson, E. S., & Gupta, A. A. (2001). An E3-like factor that promotes SUMO conjugation**  
675 **to the yeast septins. *Cell*, 106(6), 735-744. doi: S0092-8674(01)00491-3 [pii]**
- 676 **Johnson, E. S., Ma, P. C., Ota, I. M., & Varshavsky, A. (1995). A proteolytic pathway that**  
677 **recognizes ubiquitin as a degradation signal. *J Biol Chem*, 270(29), 17442-17456.**
- 678 **Johnson, E. S., Schwienhorst, I., Dohmen, R. J., & Blobel, G. (1997). The ubiquitin-like**  
679 **protein Smt3p is activated for conjugation to other proteins by an Aos1p/Uba2p**  
680 **heterodimer. *EMBO J*, 16(18), 5509-5519. doi: 10.1093/emboj/16.18.5509**
- 681 **Jones, G. M., Stalker, J., Humphray, S., West, A., Cox, T., Rogers, J., . . . Prelich, G.**  
682 **(2008). A systematic library for comprehensive overexpression screens in**  
683 ***Saccharomyces cerevisiae*. *Nat Methods*, 5(3), 239-241. doi: 10.1038/nmeth.1181**
- 684 **Kassavetis, G. A., Prakash, P., & Shim, E. (2010). The C53/C37 subcomplex of RNA**  
685 **polymerase III lies near the active site and participates in promoter opening. *J Biol***  
686 ***Chem*, 285(4), 2695-2706. doi: 10.1074/jbc.M109.074013**
- 687 **Keogh, M. C., Podolny, V., & Buratowski, S. (2003). Bur1 kinase is required for efficient**  
688 **transcription elongation by RNA polymerase II. *Mol Cell Biol*, 23(19), 7005-7018.**
- 689 **Kerman, B. E., Kim, H. J., Padmanabhan, K., Mei, A., Georges, S., Joens, M. S., . . . Gage,**  
690 **F. H. (2015). In vitro myelin formation using embryonic stem cells. *Development*,**  
691 **142(12), 2213-2225. doi: 10.1242/dev.116517**
- 692 **Kerscher, O., Felberbaum, R., & Hochstrasser, M. (2006). Modification of proteins by**  
693 **ubiquitin and ubiquitin-like proteins. *Annual Review of Cell and Developmental***  
694 ***Biology*, 22, 159-180. doi: 10.1146/annurev.cellbio.22.010605.093503**

- 695 **Kessler, J. D., Kahle, K. T., Sun, T., Meerbrey, K. L., Schlabach, M. R., Schmitt, E. M., . . .**  
696 **Westbrook, T. F. (2012). A SUMOylation-dependent transcriptional subprogram is**  
697 **required for Myc-driven tumorigenesis. *Science*, 335(6066), 348-353. doi:**  
698 **science.1212728 [pii]**  
699 **10.1126/science.1212728**
- 700 **Koren, A., Ben-Aroya, S., Steinlauf, R., & Kupiec, M. (2003). Pitfalls of the synthetic**  
701 **lethality screen in *Saccharomyces cerevisiae*: an improved design. *Curr Genet*, 43(1),**  
702 **62-69. doi: 10.1007/s00294-003-0373-8**
- 703 **Lamoliatte, F., Caron, D., Durette, C., Mahrouche, L., Maroui, M. A., Caron-Lizotte, O., . . .**  
704 **. Thibault, P. (2014). Large-scale analysis of lysine SUMOylation by SUMO**  
705 **remnant immunoaffinity profiling. *Nat Commun*, 5, 5409. doi: 10.1038/ncomms6409**
- 706 **Landrieux, E., Alic, N., Ducrot, C., Acker, J., Riva, M., & Carles, C. (2006). A subcomplex**  
707 **of RNA polymerase III subunits involved in transcription termination and**  
708 **reinitiation. *EMBO J*, 25(1), 118-128. doi: 10.1038/sj.emboj.7600915**
- 709 **Lee, J., Moir, R. D., McIntosh, K. B., & Willis, I. M. (2012). TOR signaling regulates**  
710 **ribosome and tRNA synthesis via LAMMER/Clk and GSK-3 family kinases. *Mol***  
711 ***Cell*, 45(6), 836-843. doi: 10.1016/j.molcel.2012.01.018**
- 712 **Li, S. J., & Hochstrasser, M. (1999). A new protease required for cell-cycle progression in**  
713 **yeast. *Nature*, 398(6724), 246-251. doi: 10.1038/18457**
- 714 **Li, S. J., & Hochstrasser, M. (2000). The yeast ULP2 (SMT4) gene encodes a novel protease**  
715 **specific for the ubiquitin-like Smt3 protein. *Mol Cell Biol*, 20(7), 2367-2377.**
- 716 **Mahajan, R., Delphin, C., Guan, T., Gerace, L., & Melchior, F. (1997). A small ubiquitin-**  
717 **related polypeptide involved in targeting RanGAP1 to nuclear pore complex protein**  
718 **RanBP2. *Cell*, 88(1), 97-107.**
- 719 **Matunis, M. J., Coutavas, E., & Blobel, G. (1996). A novel ubiquitin-like modification**  
720 **modulates the partitioning of the Ran-GTPase-activating protein RanGAP1**  
721 **between the cytosol and the nuclear pore complex. *J Cell Biol*, 135(6 Pt 1), 1457-**  
722 **1470.**
- 723 **McDonald, W. H., Tabb, D. L., Sadygov, R. G., MacCoss, M. J., Venable, J., Graumann, J.,**  
724 **. . . Yates, J. R., 3rd. (2004). MS1, MS2, and SQT-three unified, compact, and easily**  
725 **parsed file formats for the storage of shotgun proteomic spectra and identifications.**  
726 ***Rapid Commun Mass Spectrom*, 18(18), 2162-2168. doi: 10.1002/rcm.1603**
- 727 **Moir, R. D., Lee, J., Haeusler, R. A., Desai, N., Engelke, D. R., & Willis, I. M. (2006).**  
728 **Protein kinase A regulates RNA polymerase III transcription through the nuclear**  
729 **localization of Maf1. *Proc Natl Acad Sci U S A*, 103(41), 15044-15049. doi:**  
730 **10.1073/pnas.0607129103**



- 731 **Moir, R. D., & Willis, I. M. (2013). Regulation of pol III transcription by nutrient and**  
732 **stress signaling pathways. *Biochim Biophys Acta*, 1829(3-4), 361-375. doi:**  
733 **10.1016/j.bbagr.2012.11.001**
- 734 **Mullen, J. R., & Brill, S. J. (2008). Activation of the Slx5-Slx8 ubiquitin ligase by poly-small**  
735 **ubiquitin-like modifier conjugates. *J Biol Chem*, 283(29), 19912-19921. doi:**  
736 **M802690200 [pii]**  
737 **10.1074/jbc.M802690200**
- 738 **Nacerddine, K., Lehembre, F., Bhaumik, M., Artus, J., Cohen-Tannoudji, M., Babinet, C., .**  
739 **. . Dejean, A. (2005). The SUMO pathway is essential for nuclear integrity and**  
740 **chromosome segregation in mice. *Developmental Cell*, 9(6), 769-779. doi:**  
741 **10.1016/j.devcel.2005.10.007**
- 742 **Neyret-Kahn, H., Benhamed, M., Ye, T., Le Gras, S., Cossec, J. C., Lapaquette, P., . . .**  
743 **Dejean, A. (2013). Sumoylation at chromatin governs coordinated repression of a**  
744 **transcriptional program essential for cell growth and proliferation. *Genome***  
745 ***Research*, 23(10), 1563-1579. doi: 10.1101/gr.154872.113**
- 746 **Nie, M., Aslanian, A., Prudden, J., Heideker, J., Vashisht, A. A., Wohlschlegel, J. A., . . .**  
747 **Boddy, M. N. (2012). Dual recruitment of Cdc48 (p97)-Ufd1-Npl4 ubiquitin-selective**  
748 **segregase by small ubiquitin-like modifier protein (SUMO) and ubiquitin in SUMO-**  
749 **targeted ubiquitin ligase-mediated genome stability functions. *J Biol Chem*, 287(35),**  
750 **29610-29619. doi: 10.1074/jbc.M112.379768**
- 751 **Oficjalska-Pham, D., Harismendy, O., Smagowicz, W. J., Gonzalez de Peredo, A., Boguta,**  
752 **M., Sentenac, A., & Lefebvre, O. (2006). General repression of RNA polymerase III**  
753 **transcription is triggered by protein phosphatase type 2A-mediated**  
754 **dephosphorylation of Maf1. *Mol Cell*, 22(5), 623-632. doi:**  
755 **10.1016/j.molcel.2006.04.008**
- 756 **Okura, T., Gong, L., Kamitani, T., Wada, T., Okura, I., Wei, C. F., . . . Yeh, E. T. (1996).**  
757 **Protection against Fas/APO-1- and tumor necrosis factor-mediated cell death by a**  
758 **novel protein, sentrin. *Journal of Immunology*, 157(10), 4277-4281.**
- 759 **Panse, V. G., Hardeland, U., Werner, T., Kuster, B., & Hurt, E. (2004). A proteome-wide**  
760 **approach identifies sumoylated substrate proteins in yeast. *J Biol Chem*, 279(40),**  
761 **41346-41351. doi: 10.1074/jbc.M407950200**  
762 **M407950200 [pii]**
- 763 **Parker, J. L., Bucceri, A., Davies, A. A., Heidrich, K., Windecker, H., & Ulrich, H. D.**  
764 **(2008). SUMO modification of PCNA is controlled by DNA. *EMBO J*, 27(18), 2422-**  
765 **2431. doi: emboj2008162 [pii]**  
766 **10.1038/emboj.2008.162**
- 767 **Peng, J., Elias, J. E., Thoreen, C. C., Licklider, L. J., & Gygi, S. P. (2003). Evaluation of**  
768 **multidimensional chromatography coupled with tandem mass spectrometry**

- 769 (LC/LC-MS/MS) for large-scale protein analysis: the yeast proteome. *J Proteome*  
770 *Res*, 2(1), 43-50.
- 771 Prudden, J., Pebernard, S., Raffa, G., Slavin, D. A., Perry, J. J., Tainer, J. A., . . . Boddy,  
772 M. N. (2007). SUMO-targeted ubiquitin ligases in genome stability. *EMBO J*, 26(18),  
773 4089-4101. doi: 7601838 [pii]  
774 10.1038/sj.emboj.7601838
- 775 Psakhye, I., & Jentsch, S. (2012). Protein group modification and synergy in the SUMO  
776 pathway as exemplified in DNA repair. *Cell*, 151(4), 807-820. doi:  
777 10.1016/j.cell.2012.10.021
- 778 Reindle, A., Belichenko, I., Bylebyl, G. R., Chen, X. L., Gandhi, N., & Johnson, E. S. (2006).  
779 Multiple domains in Siz SUMO ligases contribute to substrate selectivity. *J Cell Sci*,  
780 119(Pt 22), 4749-4757. doi: 10.1242/jcs.03243
- 781 Roberts, D. N., Wilson, B., Huff, J. T., Stewart, A. J., & Cairns, B. R. (2006).  
782 Dephosphorylation and genome-wide association of Maf1 with Pol III-transcribed  
783 genes during repression. *Mol Cell*, 22(5), 633-644. doi: 10.1016/j.molcel.2006.04.009
- 784 Roeder, R. G., & Rutter, W. J. (1969). Multiple forms of DNA-dependent RNA polymerase  
785 in eukaryotic organisms. *Nature*, 224(5216), 234-237.
- 786 Roeder, R. G., & Rutter, W. J. (1970). Specific nucleolar and nucleoplasmic RNA  
787 polymerases. *Proc Natl Acad Sci U S A*, 65(3), 675-682.
- 788 Rohira, A. D., Chen, C. Y., Allen, J. R., & Johnson, D. L. (2013). Covalent SUMO  
789 modification of Maf1 controls RNA polymerase III-dependent transcription  
790 repression. *J Biol Chem*. doi: 10.1074/jbc.M113.473744
- 791 Rose, M. D., F. Winston, and P. Hieter. (1990). Methods in yeast genetics: a laboratory  
792 course manual. *Cold Spring Harbor Laboratory Press, Cold Spring Harbor, N.Y.*
- 793 Saitsu, H., Osaka, H., Sasaki, M., Takanashi, J., Hamada, K., Yamashita, A., . . .  
794 Matsumoto, N. (2011). Mutations in POLR3A and POLR3B encoding RNA  
795 Polymerase III subunits cause an autosomal-recessive hypomyelinating  
796 leukoencephalopathy. *Am J Hum Genet*, 89(5), 644-651. doi: S0002-9297(11)00437-X  
797 [pii]  
798 10.1016/j.ajhg.2011.10.003
- 799 Schmitt, M. E., Brown, T. A., & Trumpower, B. L. (1990). A rapid and simple method for  
800 preparation of RNA from *Saccharomyces cerevisiae*. *Nucleic Acids Res*, 18(10),  
801 3091-3092.
- 802 Schmittgen, T. D., & Livak, K. J. (2008). Analyzing real-time PCR data by the comparative  
803 C(T) method. *Nat Protoc*, 3(6), 1101-1108.

- 804 **Shimojima, K., Shimada, S., Tamasaki, A., Akaboshi, S., Komoike, Y., Saito, A., . . .**  
805 **Yamamoto, T. (2014). Novel compound heterozygous mutations of POLR3A**  
806 **revealed by whole-exome sequencing in a patient with hypomyelination. *Brain Dev,***  
807 **36(4), 315-321. doi: 10.1016/j.braindev.2013.04.011**
- 808 **Stettler, S., Mariotte, S., Riva, M., Sentenac, A., & Thuriaux, P. (1992). An essential and**  
809 **specific subunit of RNA polymerase III (C) is encoded by gene RPC34 in**  
810 ***Saccharomyces cerevisiae*. *J Biol Chem,* 267(30), 21390-21395.**
- 811 **Strunnikov, A. V., Aravind, L., & Koonin, E. V. (2001). *Saccharomyces cerevisiae* SMT4**  
812 **encodes an evolutionarily conserved protease with a role in chromosome**  
813 **condensation regulation. *Genetics,* 158(1), 95-107.**
- 814 **Sun, H., Leverson, J. D., & Hunter, T. (2007). Conserved function of RNF4 family proteins**  
815 **in eukaryotes: targeting a ubiquitin ligase to SUMOylated proteins. *EMBO J,***  
816 **26(18), 4102-4112. doi: 7601839 [pii]**  
817 **10.1038/sj.emboj.7601839**
- 818 **Swaney, D. L., Beltrao, P., Starita, L., Guo, A., Rush, J., Fields, S., . . . Villen, J. (2013).**  
819 **Global analysis of phosphorylation and ubiquitylation cross-talk in protein**  
820 **degradation. *Nat Methods,* 10(7), 676-682. doi: 10.1038/nmeth.2519**
- 821 **Synofzik, M., Bernard, G., Lindig, T., & Gburek-Augustat, J. (2013). Teaching**  
822 **neuroimages: hypomyelinating leukodystrophy with hypodontia due to POLR3B:**  
823 **look into a leukodystrophy's mouth. *Neurology,* 81(19), e145. doi:**  
824 **10.1212/01.wnl.0000435300.64776.7e**
- 825 **Tabb, D. L., McDonald, W. H., & Yates, J. R., 3rd. (2002). DTASelect and Contrast: tools**  
826 **for assembling and comparing protein identifications from shotgun proteomics. *J***  
827 ***Proteome Res,* 1(1), 21-26.**
- 828 **Takahashi, Y., Kahyo, T., Toh, E. A., Yasuda, H., & Kikuchi, Y. (2001). Yeast Ull1/Siz1 is a**  
829 **novel SUMO1/Smt3 ligase for septin components and functions as an adaptor**  
830 **between conjugating enzyme and substrates. *J Biol Chem,* 276(52), 48973-48977.**  
831 **doi: 10.1074/jbc.M109295200**  
832 **M109295200 [pii]**
- 833 **Tammsalu, T., Matic, I., Jaffray, E. G., Ibrahim, A. F., Tatham, M. H., & Hay, R. T.**  
834 **(2014). Proteome-wide identification of SUMO2 modification sites. *Sci Signal,***  
835 **7(323), rs2. doi: 10.1126/scisignal.2005146**
- 836 **Terao, Y., Saito, H., Segawa, M., Kondo, Y., Sakamoto, K., Matsumoto, N., . . . Nomura,**  
837 **Y. (2012). Diffuse central hypomyelination presenting as 4H syndrome caused by**  
838 **compound heterozygous mutations in POLR3A encoding the catalytic subunit of**  
839 **polymerase III. *J Neurol Sci,* 320(1-2), 102-105. doi: S0022-510X(12)00338-3 [pii]**  
840 **10.1016/j.jns.2012.07.005**

- 841 **Tetreault, M., Choquet, K., Orcesi, S., Tonduti, D., Balottin, U., Teichmann, M., . . .**  
842 **Bernard, G. (2011). Recessive mutations in POLR3B, encoding the second largest**  
843 **subunit of Pol III, cause a rare hypomyelinating leukodystrophy. *Am J Hum Genet,***  
844 **89(5), 652-655. doi: S0002-9297(11)00440-X [pii]**  
845 **10.1016/j.ajhg.2011.10.006**
- 846 **Thiffault, I., Wolf, N. I., Forget, D., Guerrero, K., Tran, L. T., Choquet, K., . . . Bernard, G.**  
847 **(2015). Recessive mutations in POLR1C cause a leukodystrophy by impairing**  
848 **biogenesis of RNA polymerase III. *Nat Commun,* 6, 7623. doi: 10.1038/ncomms8623**
- 849 **Thuillier, V., Brun, I., Sentenac, A., & Werner, M. (1996). Mutations in the alpha-amanitin**  
850 **conserved domain of the largest subunit of yeast RNA polymerase III affect pausing,**  
851 **RNA cleavage and transcriptional transitions. *EMBO J,* 15(3), 618-629.**
- 852 **Thuillier, V., Stettler, S., Sentenac, A., Thuriaux, P., & Werner, M. (1995). A mutation in**  
853 **the C31 subunit of *Saccharomyces cerevisiae* RNA polymerase III affects**  
854 **transcription initiation. *EMBO J,* 14(2), 351-359.**
- 855 **Vannini, A., Ringel, R., Kusser, A. G., Berninghausen, O., Kassavetis, G. A., & Cramer, P.**  
856 **(2010). Molecular basis of RNA polymerase III transcription repression by Maf1.**  
857 ***Cell,* 143(1), 59-70. doi: 10.1016/j.cell.2010.09.002**
- 858 **Wang, D., Bushnell, D. A., Westover, K. D., Kaplan, C. D., & Kornberg, R. D. (2006).**  
859 **Structural basis of transcription: role of the trigger loop in substrate specificity and**  
860 **catalysis. *Cell,* 127(5), 941-954. doi: 10.1016/j.cell.2006.11.023**
- 861 **Wang, Z., Jones, G. M., & Prelich, G. (2006). Genetic analysis connects SLX5 and SLX8 to**  
862 **the SUMO pathway in *Saccharomyces cerevisiae*. *Genetics,* 172(3), 1499-1509. doi:**  
863 **genetics.105.052811 [pii]**  
864 **10.1534/genetics.105.052811**
- 865 **Wang, Z., & Prelich, G. (2009). Quality control of a transcriptional regulator by SUMO-**  
866 **targeted degradation. *Mol Cell Biol,* 29(7), 1694-1706. doi: MCB.01470-08 [pii]**  
867 **10.1128/MCB.01470-08**
- 868 **Weinmann, R., & Roeder, R. G. (1974). Role of DNA-dependent RNA polymerase 3 in the**  
869 **transcription of the tRNA and 5S RNA genes. *Proc Natl Acad Sci U S A,* 71(5), 1790-**  
870 **1794.**
- 871 **White, R. J. (2004). RNA polymerase III transcription and cancer. *Oncogene,* 23(18), 3208-**  
872 **3216. doi: 10.1038/sj.onc.1207547**
- 873 **Xie, Y., Kerscher, O., Kroetz, M. B., McConchie, H. F., Sung, P., & Hochstrasser, M.**  
874 **(2007). The yeast Hex3.Slx8 heterodimer is a ubiquitin ligase stimulated by**  
875 **substrate sumoylation. *J Biol Chem,* 282(47), 34176-34184. doi: M706025200 [pii]**  
876 **10.1074/jbc.M706025200**

- 877 **Xu, T., Park, S. K., Venable, J. D., Wohlschlegel, J. A., Diedrich, J. K., Cociorva, D., . . .**  
878 **Yates, J. R., 3rd. (2015). ProLuCID: An improved SEQUEST-like algorithm with**  
879 **enhanced sensitivity and specificity. *J Proteomics*, 129, 16-24. doi:**  
880 **10.1016/j.jprot.2015.07.001**
- 881 **Yang, L., Mullen, J. R., & Brill, S. J. (2006). Purification of the yeast Slx5-Slx8 protein**  
882 **complex and characterization of its DNA-binding activity. *Nucleic Acids Res*, 34(19),**  
883 **5541-5551. doi: 10.1093/nar/gkl685**
- 884 **Zhang, T., Lei, J., Yang, H., Xu, K., Wang, R., & Zhang, Z. (2011). An improved method**  
885 **for whole protein extraction from yeast *Saccharomyces cerevisiae*. *Yeast*, 28(11),**  
886 **795-798. doi: 10.1002/yea.1905**
- 887 **Zhao, X., Wu, C. Y., & Blobel, G. (2004). Mlp-dependent anchorage and stabilization of a**  
888 **desumoylating enzyme is required to prevent clonal lethality. *J Cell Biol*, 167(4),**  
889 **605-611. doi: jcb.200405168 [pii]**  
890 **10.1083/jcb.200405168**
- 891 **Zylber, E. A., & Penman, S. (1971). Products of RNA polymerases in HeLa cell nuclei. *Proc***  
892 ***Natl Acad Sci U S A*, 68(11), 2861-2865.**  
893  
894  
895  
896



897 **SUPPLEMENTARY FIGURES AND TABLES**

898

899 **Table S1. *mot1-301* suppressor mutations.**

| <b>Gene</b>  | <b>Protein</b>  | <b>Allele name</b> | <b>Mutation</b>                                            |
|--------------|-----------------|--------------------|------------------------------------------------------------|
| <i>SMT3</i>  | SUMO            | <i>smt3-101</i>    | K40E                                                       |
|              |                 | <i>smt3-102</i>    | F37L                                                       |
|              |                 | <i>smt3-201</i>    | D68H                                                       |
|              |                 | <i>smt3-202</i>    | R46M                                                       |
|              |                 | <i>SMT3-Q56K*</i>  | Q56K                                                       |
| <i>AOS1</i>  | SUMO E1 subunit | <i>aos1-101</i>    | R21C                                                       |
| <i>UBA2</i>  | SUMO E1 subunit | <i>uba2-101</i>    | G147V                                                      |
| <i>UBC9</i>  | SUMO E2         | <i>ubc9-201</i>    | nt.G38C right before intron.<br>R13T, if spiced correctly. |
| <i>ULP1</i>  | SUMO protease   | <i>ulp1-101</i>    | L338Stop                                                   |
|              |                 | <i>ulp1-201</i>    | Insertion at nt.66                                         |
| <i>ULP2</i>  | SUMO protease   | <i>ulp2-101</i>    | C451F                                                      |
| <i>NUP84</i> | Nucleoporin     | <i>nup84-101</i>   | T-A at 39bp upstream of ORF                                |

\* Dominant mutation

900

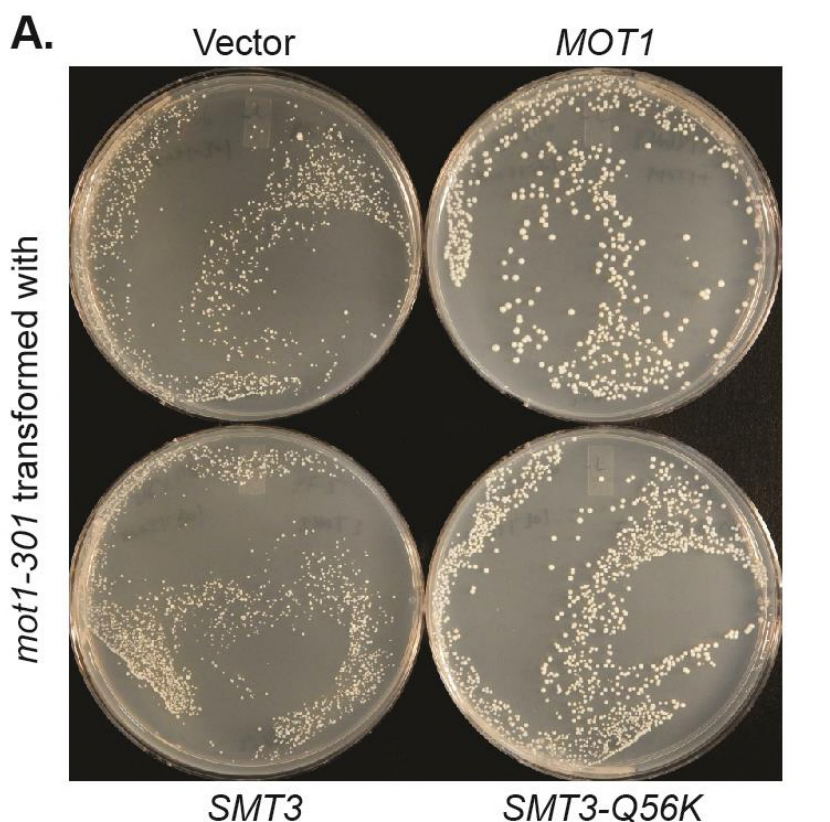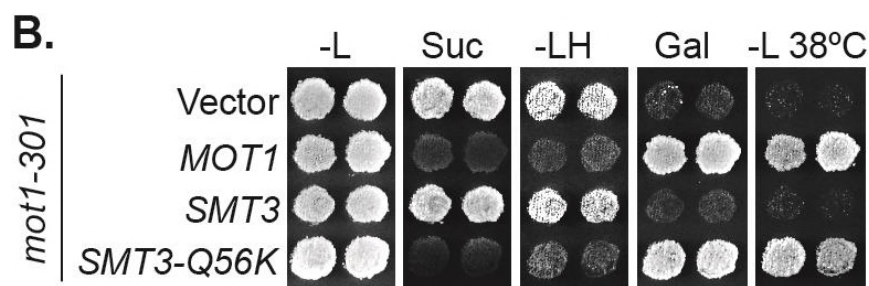

**Figure S1. *SMT3-Q56K* suppresses *mot1-301* dominantly.**

(A) A *mot1-301* strain was transformed with *CEN LEU2* vectors carrying indicated genes, then selected for transformants on SC-Leu plates. Wild type *MOT1* or *SMT3-Q56K* made *mot1-301* cells grow faster. (B) Transformants from (A) were patched on SC-Leu (-L) then replica plated to SC-Leu-His (-LH), YPSucrose (Suc), SC-Galactose (Gal) plates, or a SC-Leu plate incubated at elevated temperature 38°C (-L 38°C). *mot1-301* is His<sup>+</sup> (Spt<sup>-</sup>), Suc<sup>+</sup> (Bur<sup>-</sup>), Gal<sup>-</sup>, and Ts<sup>-</sup>, whereas *SMT3-Q56K* reversed all four phenotype. The suppression is dominant because the wild type genomic copy of *SMT3* was present in all the strains.

901  
902  
903  
904  
905  
906  
907  
908  
909  
910

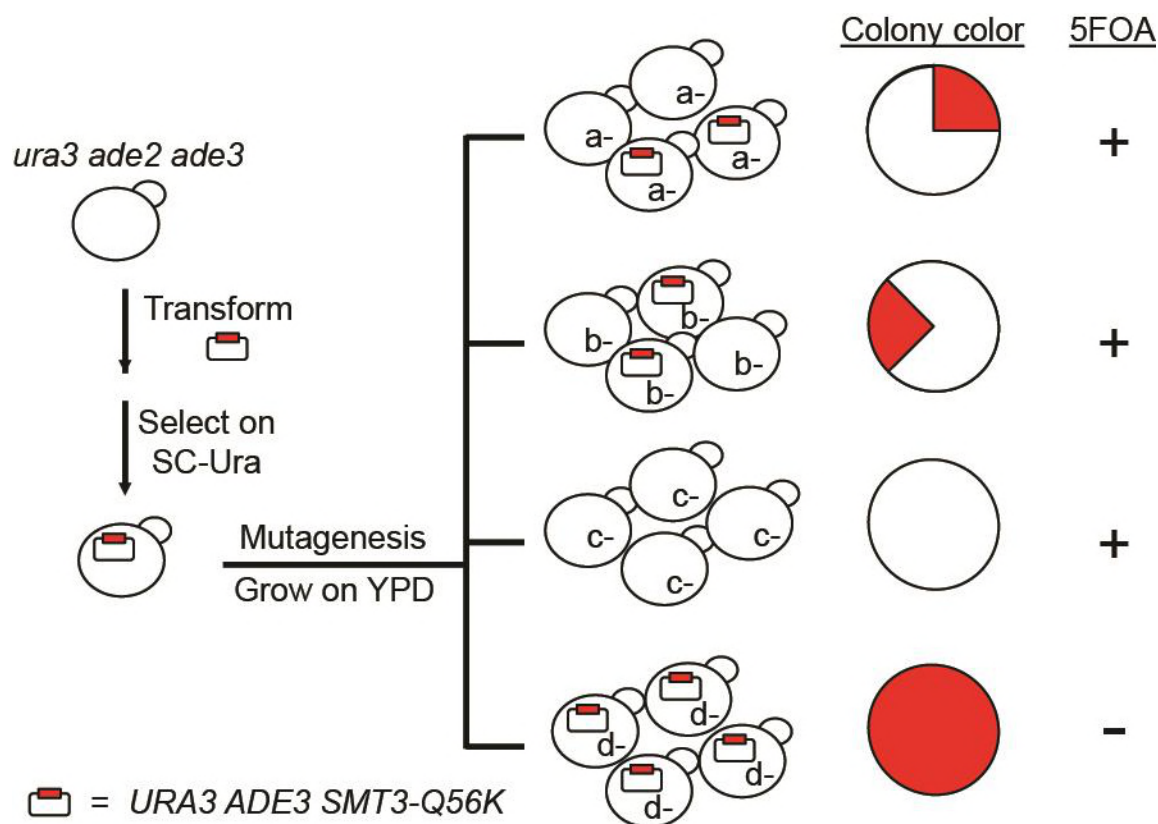

911  
 912 **Figure S2. Design of the SUMO reverse suppressor screen.** The starting strain is an *ura3 ade2*  
 913 *ade3* triple mutant. *ura3* is used for *URA3* plasmid selection and 5FOA-sensitivity test. *ade2*  
 914 *ade3* double mutant colonies are white, but the wild type *ADE3* on the plasmid complements  
 915 *ade3* and turns the cells red. A mutant (*d-*) that requires the plasmid for viability will form a  
 916 uniformly red and 5FOA-sensitive colony.  
 917

918 **Table S2. Position of the mutated residues in Pol III structure.**

| <b>Allele</b>     | <b>Mutation</b> | <b>Location/Function</b>           |
|-------------------|-----------------|------------------------------------|
| <i>rpc160-33</i>  | T379I           | Close to Rpc128 and catalytic site |
| <i>rpc160-58</i>  | M809I           | Close to Rpc128                    |
| <i>rpc160-426</i> | E282K           | Close to TFIIB                     |
| <i>rpc160-419</i> | A880T           | Bridge/NTP incorporation           |
| <i>rpc160-480</i> | G1098D          | Trigger loop/NTP incorporation     |
| <i>rpc160-628</i> | R365K           | Close to DNA                       |
| <i>rpc160-211</i> | G606S           | Rpb8                               |
| <i>rpc160-85</i>  | G1297D          | Close to DNA                       |
| <i>rpc128-202</i> | A704T           | Close to RNA                       |
| <i>rpc128-578</i> | D501N           | Close to RNA                       |

919

| Gene                               | Mutation in human protein | Mutation in yeast protein | 5FOA 30°C                |               | 5FOA 37°C                |               |
|------------------------------------|---------------------------|---------------------------|--------------------------|---------------|--------------------------|---------------|
|                                    |                           |                           | <i>SIZ1</i> <sup>+</sup> | <i>siz1</i> Δ | <i>SIZ1</i> <sup>+</sup> | <i>siz1</i> Δ |
| <i>RPC160</i><br>( <i>POLR3A</i> ) | D372N                     | D384N                     | +                        | +             | +                        | +             |
|                                    | A387G                     | A399G                     | +                        | +             | +                        | +             |
|                                    | T553I                     | S565I                     | +                        | +             | +                        | +             |
|                                    | Q599K                     | Q608K                     | -/+                      | +/-           | -/+                      | +/-           |
|                                    | E644K                     | Q658K                     | +                        | +             | +                        | +             |
|                                    | G672E                     | G686E                     | +                        | +             | +                        | +             |
|                                    | C724Y                     | C738Y                     | +                        | +             | +                        | +             |
|                                    | N775I                     | N789I                     | +                        | +             | +                        | +             |
|                                    | G784S                     | G798S                     | +                        | +             | +                        | +             |
|                                    | M852V                     | I866V                     | +                        | +             | +                        | +             |
|                                    | R1005C                    | R1061C                    | +                        | +             | +                        | +             |
|                                    | R1005H                    | R1061H                    | +                        | +             | +                        | +             |
|                                    | G1240S                    | G1308S                    | +                        | +             | +                        | +             |
|                                    | E1261K                    | E1329K                    | -                        | -             | -                        | -             |
|                                    | A1331T                    | A1399T                    | +                        | +             | +                        | +             |
| D372N, N775I                       | D384N, N789I              | -                         | +/-                      | -             | -/+                      |               |
| Q599K, G1240S                      | Q608K, G1308S             | -/+                       | +/-                      | -             | -                        |               |
| <i>RPC128</i><br>( <i>POLR3B</i> ) | T503K                     | T521K                     | +                        | +             | +                        | +             |
|                                    | V523E                     | I541E                     | +                        | +             | +                        | +             |
|                                    | D895N                     | D910N                     | +                        | +             | +                        | +             |
|                                    | L1012P                    | L1027P                    | -/+                      | +             | -                        | +/-           |
|                                    | L1117V                    | L1132V                    | +                        | +             | +                        | +             |
|                                    | V523E, D895N              | I541E, D910N              | -                        | -             | -                        | -             |
|                                    | V523E, L1012P             | I541E, L1027P             | -                        | -             | -                        | -             |
| V523E, L1117V                      | I541E, L1132V             | -                         | -                        | -             | -                        |               |
| <i>BRF1</i><br>( <i>BRF1</i> )     | R223W                     | R218W                     | -                        | -             | -                        | -             |
|                                    | S226L                     | A221L                     | +                        | +             | +                        | +             |
|                                    | T259M                     | T254M                     | -                        | +/-           | -                        | -/+           |
|                                    | P292H                     | P288H                     | +/-                      | +             | -/+                      | +             |

920 **Table S3. Growth phenotype of Pol III disease mutations in yeast.**

921 *CEN LEU2* plasmids containing the indicated mutant alleles (e.g. *rpc160* mutants) were  
922 transformed into a corresponding null strain in wild type *SIZ1* or *siz1*Δ background (e.g.  
923 *rpc160*Δ and *rpc160*Δ *siz1*Δ strains) covering by a wild type *URA3* plasmid (e.g. a *URA3*  
924 *RPC160* plasmid). Transformants were then patched on a SC-Leu plate, replica plated to 5FOA



925 plates, and incubated at 30°C or 37°C. Growth was scored after two days of incubation. The  
926 human gene names were shown in parenthesis underneath the yeast gene names.

927

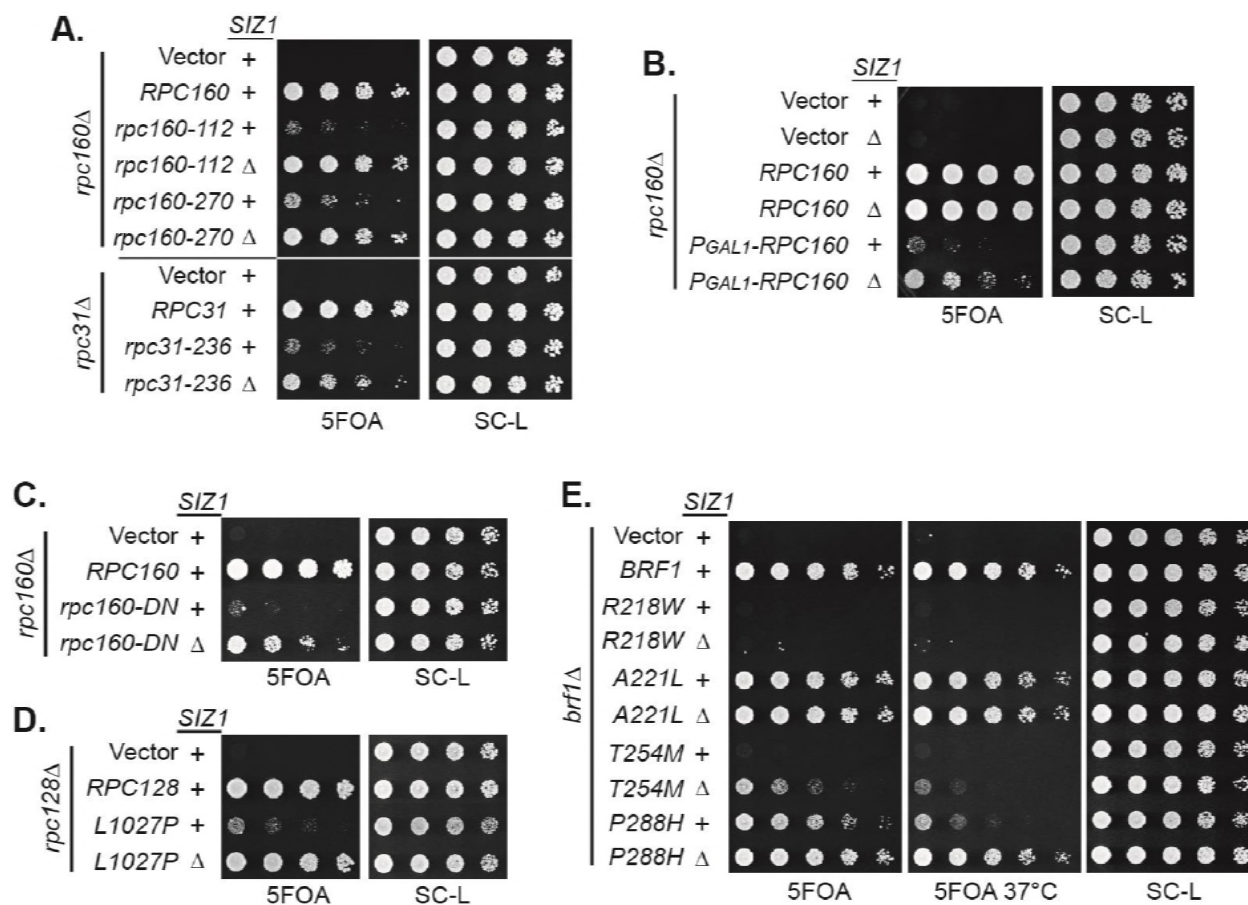

928

929 **Figure S3. *siz1Δ* rescued a wide spectrum of Pol III mutations.** (A) Plasmid shuffle  
 930 experiments to test the growth phenotype of known *rpc160* and *rpc31* mutants in wild type *SIZ1*  
 931 or *siz1Δ* background. The *RPC160* or *RPC31* alleles were on *LEU2* vectors. The parental  
 932 *rpc160Δ* and *rpc31Δ* strains contain a *URA3* plasmid carrying wild type *RPC160* or *RPC31*,  
 933 respectively. (B) Wild type *RPC160* was placed under control of the *GAL1* promoter on a *LEU2*  
 934 vector then transformed into an *rpc160* strain carrying a *URA3 RPC160* plasmid, which was lost  
 935 in the presence of 5FOA. The 5FOA plate contained glucose as the only carbon source, which  
 936 strongly repressed *RPC160* expression, making the cells grow extremely slowly. *siz1Δ* partially  
 937 alleviated this growth defect. (C-E) Similar plasmid shuffle experiments showing the rescue  
 938 effect of *siz1Δ* on disease causing mutations. *rpc160-DN*: D384N, N789I.

939

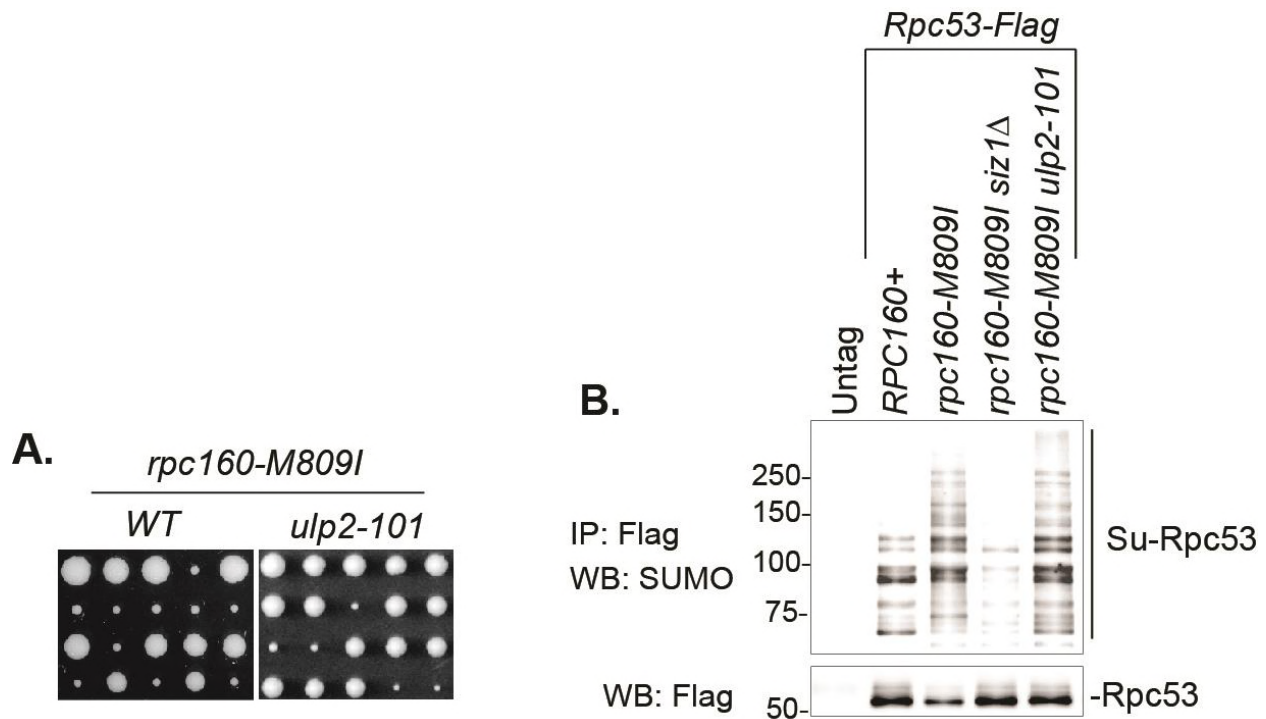

940

941 **Figure S4. *ulp2-101* rescued *rpc160-M809I* without abolishing Rpc53 sumoylation.** (A) An  
942 *rpc160-M809I* strain was crossed with a wild type (left) or an *ulp2-101* mutant strain (right),  
943 followed by tetrad analysis. The growth of five representative tetrads were shown. The cross  
944 between *rpc160-M809I* and wild type *ULP2* always yielded two large colonies and two small  
945 colonies, indicating *rpc160-M809I* caused severe growth defect. The cross between *rpc160-*  
946 *M809I* and *ulp2-101* in most cases yielded three large colonies and one small colony, indicating  
947 *rpc160-M809I* was rescued by *ulp2-101*. (B) Flag-tagged Rpc53 proteins from the indicated  
948 strains were purified using anti-Flag beads, followed by SDS-PAGE and immunoblotting using  
949 an anti-SUMO antibody (top) or an anti-Flag antibody (bottom). *siz1Δ* abolished Rpc53  
950 sumoylation, while *ulp2-101* did not.

951

952 **Table S4. Summary of sumoylated polymerase subunits**

| Hendriks IA, et al. |            | Tammsalu T, et al.      |            | Lamoliatte F, et al. |            |
|---------------------|------------|-------------------------|------------|----------------------|------------|
| Modified protein    | # of sites | Modified protein        | # of sites | Modified protein     | # of sites |
| RPA34 (Pol I)       | 2          | RPA34 (Pol I)           | 1          | RPC4 (Pol III)       | 1          |
| RPB1 (Pol II)       | 4          | RPC4 (Pol III)          | 7          |                      |            |
| RPB3 (Pol II)       | 1          | RPC6 (Pol III)          | 1          |                      |            |
| RPC3 (Pol III)      | 1          | RPABC3 (Pol I, II, III) | 1          |                      |            |
| RPC4 (Pol III)      | 7          |                         |            |                      |            |
| RPC5 (Pol III)      | 2          |                         |            |                      |            |
| RPC6 (Pol III)      | 1          |                         |            |                      |            |
| RPAC1 (Pol I, III)  | 1          |                         |            |                      |            |

953

954

955 **Table S5. Yeast strains used in this study.**

| Strain Name | Genotype                                                                                                                                                                                                                                                           |
|-------------|--------------------------------------------------------------------------------------------------------------------------------------------------------------------------------------------------------------------------------------------------------------------|
| ZBY116      | <i>MATa his4-912<math>\delta</math> lys2-128<math>\delta</math> suc2<math>\Delta</math>uas(-1900/-390) ura3-52 leu2<math>\Delta</math>1 trp1<math>\Delta</math>63 mot1-301</i>                                                                                     |
| ZOY261      | <i>MATa ade2 ade3 can1<math>\Delta</math>::FUR1::natMX4 ura3 leu2 trp1<math>\Delta</math>63 his3<math>\Delta</math>1 lys2-128<math>\delta</math></i>                                                                                                               |
| ZBY694      | <i>MATa his4-912<math>\delta</math> lys2-128<math>\delta</math> suc2<math>\Delta</math>uas(-1900/-390) ura3-52 leu2<math>\Delta</math>1 trp1<math>\Delta</math>63 rpc128<math>\Delta</math>2::natMX4 [pF92 (CEN URA3 RPC128)] [pZW393 (CEN LEU2 rpc128-A704T)]</i> |
| ZBY282      | <i>MAT<math>\alpha</math> suc2<math>\Delta</math>uas(-1900/-390) ura3-52 leu2<math>\Delta</math>1 trp1<math>\Delta</math>63 rpc160-M809I-3HA-kanMX6 [pZW328 (CEN URA3 RPC160)] his4-912<math>\delta</math></i>                                                     |
| ZBY306      | <i>MATa suc2<math>\Delta</math>uas(-1900/-390) ura3-52 leu2<math>\Delta</math>1 trp1<math>\Delta</math>63 his4-912<math>\delta</math> lys2-128<math>\delta</math> siz1<math>\Delta</math>::TRP1</i>                                                                |
| ZBY301      | <i>MATa his4-912<math>\delta</math> lys2-128<math>\delta</math> suc2<math>\Delta</math>uas(-1900/-390) ura3-52 trp1<math>\Delta</math>63 siz2<math>\Delta</math>::KAN</i>                                                                                          |
| ZBY259      | <i>MAT<math>\alpha</math> his4-912<math>\delta</math> suc2<math>\Delta</math>uas(-1900/-390) ura3-52 leu2<math>\Delta</math>1 trp1<math>\Delta</math>63 rpc160<math>\Delta</math>1::TRP1 [pZW328 (CEN URA3 TRS33 RPC160)]</i>                                      |
| ZBY419      | <i>MATa suc2<math>\Delta</math>uas(-1900/-390) ura3-52 leu2<math>\Delta</math>1 trp1<math>\Delta</math>63 rpc160<math>\Delta</math>1::TRP1 [pZW328 (CEN URA3 RPC160)] siz1<math>\Delta</math>::TRP1 his4-912<math>\delta</math></i>                                |
| ZBY788      | <i>MAT<math>\alpha</math> suc2<math>\Delta</math>uas(-1900/-390) ura3-52 leu2<math>\Delta</math>1 trp1<math>\Delta</math>63 rpc31<math>\Delta</math>1::kanMX6 [pZW420 (CEN URA3 RPC31)] lys2-128<math>\delta</math></i>                                            |
| ZBY829      | <i>MAT<math>\alpha</math> suc2<math>\Delta</math>uas(-1900/-390) ura3-52 leu2<math>\Delta</math>1 trp1<math>\Delta</math>63 rpc31<math>\Delta</math>1::kanMX6 [pZW420 (CEN URA3 RPC31)] siz1<math>\Delta</math>::TRP1 lys2-128<math>\delta</math></i>              |
| ZBY780      | <i>MAT<math>\alpha</math> suc2<math>\Delta</math>uas(-1900/-390) ura3-52 leu2<math>\Delta</math>1 trp1<math>\Delta</math>63 rpb1<math>\Delta</math>1::kanMX6 [pZW413 (CEN URA3 RPB1)]</i>                                                                          |
| ZBY823      | <i>MAT<math>\alpha</math> suc2<math>\Delta</math>uas(-1900/-390) ura3-52 leu2<math>\Delta</math>1 trp1<math>\Delta</math>63 rpb1<math>\Delta</math>1::kanMX6 [pZW413 (CEN URA3 RPB1)] siz1<math>\Delta</math>::TRP1</i>                                            |
| ZBY1065     | <i>MATa suc2<math>\Delta</math>uas(-1900/-390) his4-912<math>\delta</math> lys2-128<math>\delta</math> ura3-52 trp1<math>\Delta</math>63 rpa190<math>\Delta</math>1::kanMX6 [pZW544 (CEN URA3 RPA190)] leu2<math>\Delta</math>1</i>                                |
| ZBY1067     | <i>MATa suc2<math>\Delta</math>uas(-1900/-390) his4-912<math>\delta</math> lys2-128<math>\delta</math> ura3-52 trp1<math>\Delta</math>63 rpa190<math>\Delta</math>1::kanMX6 [pZW544 (CEN URA3 RPA190)] siz1<math>\Delta</math>::TRP1 leu2<math>\Delta</math>1</i>  |
| ZBY739      | <i>MAT<math>\alpha</math> suc2<math>\Delta</math>uas(-1900/-390) ura3-52 leu2<math>\Delta</math>1 trp1<math>\Delta</math>63 kns1<math>\Delta</math>1::kanMX6 his4-912<math>\delta</math></i>                                                                       |
| ZBY747      | <i>MAT<math>\alpha</math> suc2<math>\Delta</math>uas(-1900/-390) ura3-52 leu2<math>\Delta</math>1 trp1<math>\Delta</math>63 mck1<math>\Delta</math>::natMX4 his4-912<math>\delta</math></i>                                                                        |
| ZBY313      | <i>MATa suc2<math>\Delta</math>uas(-1900/-390) ura3-52 leu2<math>\Delta</math>1 trp1<math>\Delta</math>63 maf1<math>\Delta</math>1::natMX4 lys2-128<math>\delta</math></i>                                                                                         |
| ZBY18       | <i>MATa his4-912<math>\delta</math> lys2-128<math>\delta</math> suc2<math>\Delta</math>uas(-1900/-390) ura3-52 leu2<math>\Delta</math>1</i>                                                                                                                        |
| ZBY445      | <i>MATa rpc160-M809I-3HA::kanMX6 ura3-52 lys2-128<math>\delta</math> suc2<math>\Delta</math>uas(-1900/-390) trp1<math>\Delta</math>63</i>                                                                                                                          |
| ZBY346      | <i>MATa his4-912<math>\delta</math> suc2<math>\Delta</math>uas(-1900/-390) ura3-52 leu2<math>\Delta</math>1 trp1<math>\Delta</math>63 rpc160-M809I-3HA-kanMX6 siz1<math>\Delta</math>::TRP1</i>                                                                    |



|         |                                                                                                                                   |
|---------|-----------------------------------------------------------------------------------------------------------------------------------|
| ZBY370  | <i>MATa suc2Δuas(-1900/-390) ura3-52 leu2Δ1 trp1Δ63 his4-912d maf1Δ1::natMX4 rpc160-M809I-3HA-kanMX6</i>                          |
| ZBY439  | <i>MATa suc2Δuas(-1900/-390) ura3-52 leu2Δ1 trp1Δ63 his4-912d maf1Δ1::natMX4 rpc160-M809I-3HA-kanMX6 siz1Δ::TRP1</i>              |
| ZBY434  | <i>MATa suc2Δuas(-1900/-390) ura3-52 leu2Δ1 trp1Δ63 his4-912d maf1Δ1::natMX4 siz1Δ::TRP1</i>                                      |
| ZOY341  | <i>MATα ura3 leu2 trp1Δ63 rpc160-M809I-Flag::TRP1 smt3Δ::kan [pZW357 (2μ LEU2 smt3-I96R)] slx5Δ::URA3 his4-912δ</i>               |
| ZOY504  | <i>MATα ura3 leu2 trp1Δ63 his3Δ1 smt3Δ::TRP1 [pZW508 (2μ LEU2 GFP-SMT3)] slx5Δ::URA3 met15Δ0 suc2Δuas(-1900/-390) lys2-128δ</i>   |
| ZOY505  | <i>MATα ura3 leu2 trp1Δ63 met15Δ0 his3Δ1 rpc160-M809I-Flag::TRP1 slx5Δ::URA3 smt3Δ::kan [pZW508 (2μ LEU2 GFP-SMT3)]</i>           |
| ZBY1106 | <i>MATa suc2Δuas(-1900/-390) ura3-52 leu2Δ1 trp1Δ63 lys2-128δ rpc53Δ2::hphMX4 [pZW551 (CEN URA3 RPC53)]</i>                       |
| ZOY465  | <i>MATa ura3 leu2 trp1Δ63 lys2-128δ rpc128-A704T [pF92 (CEN URA3 RPC128)]</i>                                                     |
| ZBY1056 | <i>MATa suc2Δuas(-1900/-390) ura3-52 leu2Δ1 trp1Δ63 RPC53-Flag::natMX4 his4-912d</i>                                              |
| ZBY1054 | <i>MATα suc2Δuas(-1900/-390) ura3-52 leu2Δ1 trp1Δ63 RPC53-Flag::natMX4 rpc160-M809I-3HA::kanMX6</i>                               |
| ZBY1257 | <i>MATα suc2Δuas(-1900/-390) ura3-52 leu2Δ1 trp1Δ63 RPC53-Flag::natMX4 siz1Δ::TRP1 his4-912d</i>                                  |
| ZBY1479 | <i>MATa suc2Δuas(-1900/-390) ura3-52 leu2Δ1 trp1Δ63 RPC53-Flag::natMX4 siz2Δ::kan lys2-128d</i>                                   |
| ZBY1263 | <i>MATa suc2Δuas(-1900/-390) ura3-52 leu2Δ1 trp1Δ63 RPC53-Flag::natMX4 ulp2-101 rpc160-M809I-3HA::kanMX6 his4-912d</i>            |
| ZBY660  | <i>MATa suc2Δuas(-1900/-390) ura3-52 leu2Δ1 trp1Δ63 rpc128Δ2::natMX4 [pF92 (CEN URA3 RPC128)] siz1Δ::TRP1 his4-912δ lys2-128δ</i> |
| ZBY661  | <i>MATa suc2Δuas(-1900/-390) ura3-52 leu2Δ1 trp1Δ63 rpc128Δ2::natMX4 [pF92 (CEN URA3 RPC128)] his4-912δ lys2-128δ</i>             |
| ZBY1233 | <i>MATa suc2Δuas(-1900/-390) ura3-52 leu2Δ1 trp1Δ63 brf1Δ1::kanMX6 [pZW679 (CEN URA3 BRF1)] siz1Δ::TRP1</i>                       |
| ZBY1235 | <i>MATa suc2Δuas(-1900/-390) ura3-52 leu2Δ1 trp1Δ63 brf1Δ1::kanMX6 [pZW679 (CEN URA3 BRF1)]</i>                                   |
| ZBY91   | <i>MATa his4-912d lys2-128d suc2Δuas(-1900/-390) ura3-52 leu2Δ1 trp1Δ63 slx5Δ::URA3</i>                                           |
| ZBY92   | <i>MATa his4-912d lys2-128d suc2Δuas(-1900/-390) ura3-52 leu2Δ1 trp1Δ63 slx8Δ::TRP1</i>                                           |
| ZBY290  | <i>MATα suc2Δuas(-1900/-390) ura3-52 leu2Δ1 trp1Δ63 rpc160-G1297D-3HA-kanMX6 [pZW328 (CEN URA3 RPC160)] his4-912d</i>             |
| ZOY197  | <i>MATa his3Δ1 ura3Δ0 leu2Δ0 met15Δ0 ubc4Δ::KAN</i>                                                                               |

|         |                                                                                                                                                       |
|---------|-------------------------------------------------------------------------------------------------------------------------------------------------------|
| PJ69-4A | <i>MATa his3Δ200 leu2-3,112 trp1-901 ura3-52 gal4Δ gal80Δ LYS2::GAL1-HIS3 ade2::GAL2-ADE2 met2::GAL7-LacZ</i>                                         |
| ZBY364  | <i>MATa suc2Δuas(-1900/-390) ura3-52 leu2Δ1 trp1Δ63 rpc160-G1297D-3HA-kanMX6 slx5Δ::URA3 his4-912d</i>                                                |
| ZBY1145 | <i>MATα suc2Δuas(-1900/-390) ura3-52 leu2Δ1 trp1Δ63 cdc48Δ2::hphMX4 [pZW880 (CEN LEU2 cdc48-3)] his4-912d</i>                                         |
| ZBY1451 | <i>MATα suc2Δuas(-1900/-390) ura3-52 leu2Δ1 trp1Δ63 cdc48Δ2::hphMX4 [pZW881 (CEN LEU2 cdc48-sim)] his4-912d</i>                                       |
| ZBY1460 | <i>MATa suc2Δuas(-1900/-390) ura3-52 leu2Δ1 trp1Δ63 ufd1Δ2::hphMX4 [pZW879 (CEN LEU2 ufd1-sim)] lys2-128d</i>                                         |
| ZBY1513 | <i>MATa suc2Δuas(-1900/-390) ura3-52 leu2Δ1 trp1Δ63 rpc160-M809I-3KR-3HA::kanMX6 his4-912d</i>                                                        |
| ZBY1545 | <i>MATa suc2Δuas(-1900/-390) ura3-52 leu2Δ1 trp1Δ63 rpc160-G1297D-3KR-3HA::kanMX6 his4-912d</i>                                                       |
| ZBY1537 | <i>MATa suc2Δuas(-1900/-390) ura3-52 leu2Δ1 trp1Δ63 rpc160-3KR-3HA::kanMX6 his4-912d</i>                                                              |
| ZBY1118 | <i>MATα suc2Δuas(-1900/-390) ura3-52 leu2Δ1 trp1Δ63 lys2-128d rpc53Δ2::hphMX4 [pZW577 (CEN LEU2 rpc53-3KR-Flag)]</i>                                  |
| ZBY591  | <i>MATa suc2Δuas(-1900/-390) ura3-52 leu2Δ1 trp1Δ63 pdr5Δ1::natMX4 his4-912d</i>                                                                      |
| ZBY521  | <i>MATa suc2Δuas(-1900/-390) ura3-52 leu2Δ1 trp1Δ63 rpc160-M809I-Flag::TRP1 slx5Δ::URA3</i>                                                           |
| ZBY1466 | <i>MATa suc2Δuas(-1900/-390) ura3-52 leu2Δ1 trp1Δ63 cdc48Δ2::hphMX4 [pZW898 (CEN LEU2 cdc48-3-Flag)] lys2-128d</i>                                    |
| ZBY1496 | <i>MATα suc2Δuas(-1900/-390) ura3-52 leu2Δ1 trp1Δ63 cdc48Δ2::hphMX4 [pZW898 (CEN LEU2 cdc48-3-Flag)] rpc160-M809I-3HA::kanMX6 his4-912d lys2-128d</i> |
| ZBY1574 | <i>MATa his4-912d suc2Δuas(-1900/-390) ura3-52 leu2Δ1 trp1Δ63 rpc160-G1297D-3HA-kanMX6 slx8Δ::TRP1 lys2-128d [pZW328 (CEN URA3 RPC160)]</i>           |

956

957

958 **Table S6. Plasmids used in this study.**

| <b>Plasmid name</b> | <b>Markers</b>                                   |
|---------------------|--------------------------------------------------|
| pRS415              | <i>Amp CEN LEU2</i>                              |
| pRS425              | <i>Amp 2<math>\mu</math> LEU2</i>                |
| pF5                 | <i>Amp CEN LEU2 SMT3</i>                         |
| pZW81               | <i>Amp CEN LEU2 MOT1</i>                         |
| pZW311              | <i>Amp CEN LEU2 SMT3-Q56K</i>                    |
| pZW321              | <i>Amp CEN URA3 ADE3 SMT3-Q56K</i>               |
| pAK21-1             | <i>Amp CEN TRP1 ade3-pink</i>                    |
| pZW548              | <i>Amp CEN LEU2 RPA190</i>                       |
| pZW890              | <i>Amp CEN LEU2 rpa190-G1194D</i>                |
| pZW411              | <i>Amp CEN LEU2 RPB1</i>                         |
| pZW8910             | <i>Amp CEN LEU2 rpb1-G1073D</i>                  |
| pZW326              | <i>Amp CEN LEU2 RPC160</i>                       |
| pZW371              | <i>Amp CEN LEU2 rpc160-G1098D</i>                |
| pZW400              | <i>Amp CEN LEU2 rpc160-112</i>                   |
| pZW401              | <i>Amp CEN LEU2 rpc160-270</i>                   |
| pZW873              | <i>Amp CEN LEU2 P<sub>GAL1</sub>-RPC160-Flag</i> |
| pZW419              | <i>Amp CEN LEU2 RPC31</i>                        |
| pZW423              | <i>Amp CEN LEU2 rpc31-236</i>                    |
| pZW725              | <i>Amp CEN LEU2 RPC53</i>                        |
| pZW564              | <i>Amp CEN LEU2 RPC53-Flag</i>                   |
| pZW565              | <i>Amp CEN LEU2 rpc53-K51R-Flag</i>              |
| pZW566              | <i>Amp CEN LEU2 rpc53-K115R-Flag</i>             |
| pZW567              | <i>Amp CEN LEU2 rpc53-K216R-Flag</i>             |
| pZW569              | <i>Amp CEN LEU2 rpc53-K236R-Flag</i>             |
| pZW570              | <i>Amp CEN LEU2 rpc53-K115,236R-Flag</i>         |
| pZW575              | <i>Amp CEN LEU2 rpc53-K51,115R-Flag</i>          |
| pZW576              | <i>Amp CEN LEU2 rpc53-K51,236R-Flag</i>          |
| pZW577              | <i>Amp CEN LEU2 rpc53-K51,115,236R-Flag</i>      |
| pZW568              | <i>Amp CEN LEU2 rpc53-K322,325R-Flag</i>         |

|         |                                                                                                |
|---------|------------------------------------------------------------------------------------------------|
| pZW571  | <i>Amp CEN LEU2 rpc53<math>\Delta</math>2-275-Flag</i>                                         |
| pZW384  | <i>Amp CEN LEU2 RPC128</i>                                                                     |
| pZW596  | <i>Amp CEN LEU2 smt3<math>\Delta</math>GG-rpc53-K51,115,236R-Flag</i>                          |
| pZW630  | <i>Amp CEN LEU2 rpc160-S565I</i>                                                               |
| pZW579  | <i>Amp CEN LEU2 rpc160-D384N, N789I</i>                                                        |
| pZW640  | <i>Amp CEN LEU2 rpc160-E1329K</i>                                                              |
| pZW387  | <i>Amp CEN LEU2 rpc128-I541E</i>                                                               |
| pZW624  | <i>Amp CEN LEU2 rpc128-L1027P</i>                                                              |
| pZW678  | <i>Amp CEN LEU2 BRF1</i>                                                                       |
| pZW680  | <i>Amp CEN LEU2 brf1-R218W</i>                                                                 |
| pZW681  | <i>Amp CEN LEU2 brf1-A221L</i>                                                                 |
| pZW682  | <i>Amp CEN LEU2 brf1-T254M</i>                                                                 |
| pZW683  | <i>Amp CEN LEU2 brf1-P288H</i>                                                                 |
| pZW144  | <i>Amp 2<math>\mu</math> LEU2 SMT3</i>                                                         |
| pGADT7  | <i>Amp 2<math>\mu</math> LEU2GAL4-AD</i>                                                       |
| pGBKT7  | <i>Kan 2<math>\mu</math> TRP1 GAL4-BD</i>                                                      |
| pCS6514 | <i>Amp 2<math>\mu</math> LEU2 GAL4-AD-SLX5</i>                                                 |
| pZW584  | <i>Kan 2<math>\mu</math> TRP1 GAL4-BD-RPC53</i>                                                |
| pZW591  | <i>Kan 2<math>\mu</math> TRP1 GAL4-BD-rpc53-3KR</i>                                            |
| pZW592  | <i>Kan 2<math>\mu</math> TRP1 GAL4-BD-rpc53<math>\Delta</math>N (<math>\Delta</math>2-275)</i> |
| pZW331  | <i>Amp CEN URA3 RPC160-HA</i>                                                                  |
| pZW332  | <i>Amp CEN URA3 rpc160-M809I-HA</i>                                                            |
| pZW968  | <i>Amp CEN URA3 rpc160-M809I-3KR-HA</i>                                                        |
| pZW938  | <i>Amp CEN LEU2 SIZ1-Myc</i>                                                                   |
| pZW940  | <i>Amp CEN LEU2 P<sub>CUP1</sub>-siz1<math>\Delta</math>SAP-Myc (<math>\Delta</math>34-68)</i> |
| pZW941  | <i>Amp CEN LEU2 P<sub>CUP1</sub>-siz1-SAP*-Myc</i>                                             |
| pGP776  | <i>Amp CEN LEU2 SIZ1</i>                                                                       |
| pZW903  | <i>Amp CEN LEU2 SIZ1-Flag</i>                                                                  |
| pZW904  | <i>Amp CEN LEU2 P<sub>CUP1</sub>-siz1<math>\Delta</math>SAP-Flag</i>                           |
| pZW942  | <i>Amp CEN LEU2 P<sub>CUP1</sub>-siz1-SAP*-Flag</i>                                            |

|        |                                                                                                           |
|--------|-----------------------------------------------------------------------------------------------------------|
| pZW986 | <i>Amp 2<math>\mu</math> LEU2 HA-SLX8</i>                                                                 |
| pZW993 | <i>Amp 2<math>\mu</math> LEU2 P<sub>CUP1</sub>-HA-slx8<math>\Delta</math>N (<math>\Delta</math>2-163)</i> |

959



| Gene            | Sequence                                                        |
|-----------------|-----------------------------------------------------------------|
| tM(CAU)         | Forward: GCTTCAGTAGCTCAGTAGGAA<br>Reverse: TGCTCCAGGGGAGGTTC*   |
| tG(UCC)         | Forward: GGGCGGTTAGTGTAGTGGTT<br>Reverse: TGAGCGGTACGAGAATCGAA* |
| tL(CAA)         | Forward: GGTTGTTTGGCCGAGCG<br>Reverse: TGGTTGCTAAGAGATTCGAACTC* |
| pre-tL(CAA)A    | Forward: GGTTGTTTGGCCGAGCG<br>Reverse: CCCACAGTTCACTGCGGTC      |
| ACT1            | Forward: CTGGTATGTTCTAGCGCTTG<br>Reverse: ATCTCTCGAGCAATTGGGAC  |
| TDH3<br>(GAPDH) | Forward: CTGGTGAAGTTTCCCACGAT<br>Reverse: TCGTTAACACCCATGACGAA  |
| 18S rDNA        | Forward: TCGACCCTTTGGAAGAGATG<br>Reverse: CTCCGGAATCGAACCCCTTAT |

\* Used as gene-specific primer in reverse transcription

960 **Table S7. Primers used in this study.** The same primers were used in RNA level measurement  
961 and in chromatin IP experiments.

962

963
